# Supplementary material for: Biosynthesis of phomactins: common intermediate phomactatriene and taxadieneElectronic supplementary information (ESI) available: 1H and 13C NMR spectra for labelled and unlabelled 1.See http://www.rsc.org/suppdata/cc/b4/b401377h/
Source: Royal Society of Chemistry journal article supplement (doi:10.1039/b401377h), 2004-01-01

## **General Procedure for Feeding Experiments with Isotopically Labeled Compounds.**

*Phoma* sp. was inoculated to the medium (100 mL, pH 8.5) in 500 mL Erlenmeyer flask containing polypeptone 10 g/L, sucrose 20 g/L, K<sub>2</sub>HPO<sub>4</sub> 5 g/L. After inoculation, the organism was grown at 25°C and 180 rpm. On the fifth day after inoculation, the aqueous solution (8.8 mL) of 400 mg of isotopically labeled compounds (sodium [1-<sup>13</sup>C]- (99 atom % <sup>13</sup>C), [1, 2-<sup>13</sup>C<sub>2</sub>]acetates (99 atom % <sup>13</sup>C), Cambridge Isotope Lab) filtered through sterilized microfilter (0.2 μm) was equally distributed into four 500 mL flasks. After further incubation for 12 days, mycelium was collected by filtration, disrupted with Polytron homogenizer, and extracted with acetone. This extract was concentrated *in vacuo* and the resultant aqueous layer was extracted with EtOAc. Drying over Na<sub>2</sub>SO<sub>4</sub>, the EtOAc extract was concentrated *in vacuo* to afford the oily residue which was chromatographed with SiO<sub>2</sub> column (100 % hexane) to collect fractions containing phomactatriene. These fractions were concentrated and the residue was separated by HPLC with the GL Science reversed phase column (Inertsil ODS-2, 5 μm, φ4 x 250 mm; flow rate 1 mL/min; UV 205 nm) with 100 % CH<sub>3</sub>CN to give phomactatriene. The yield of phomactatriene was 0.5 to 1 mg in each experiment.

Oikawa PMT 1mg /90uL C6D6  
dH(Solv)=7.15ppm, dC(solv)=128.0ppm  
Bruker AMX-500/ GC-MS & NMR Lab.  
Grad. Sch. Agric., Hokkaido Univ.  
H=piccpmt/1 C=piccpmt/2

<sup>1</sup>H-NMR spectrum of phomactatriene (C6D6, 500 MHz)

File F:\XWIN\_NMR\PICCPMT\1\PDAT  
Date  
Comment  
Oikawa PMT 1mg /90uL C6D6  
dH(Solv)=7.15ppm, dC(solv)=1  
Bruker AMX-500/ GC-MS & NMR  
Grad. Sch. Agric., Hokkaido  
H=piccpmt/1 C=piccpmt/2

ObsNuc ?  
ExMode  
ObsFreq 500.12 MHz  
ObsSet 0.0 kHz  
ObsFine 9994.533 Hz  
Point 32768  
Frequency(Span) 8064.516 Hz  
Scan 0  
AcqTime 4.0632 s  
PD 0.0 s  
Pulse1 10.0 μs  
IrrNuc  
ProbeHead  
Instrument  
Pulse Program  
Gradient Program  
Temperature 0.0  
Solvent  
Reference 13.9576 pp  
Broad.Factor 0.25 Hz  
Window Exponential  
RGain 0

Operator \_\_\_\_\_

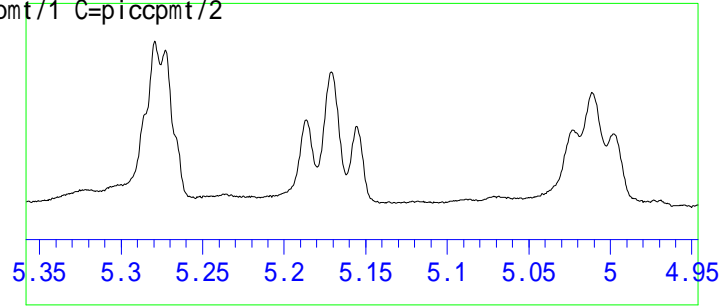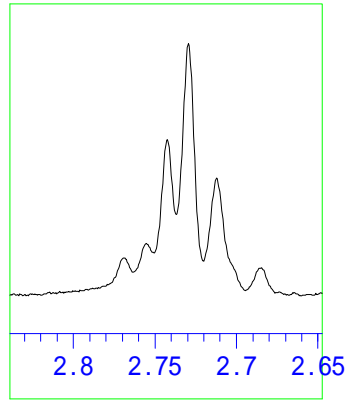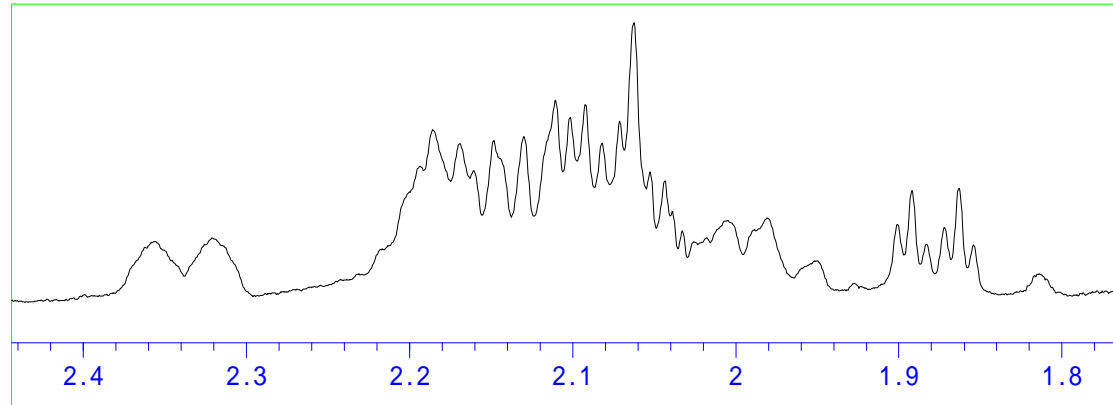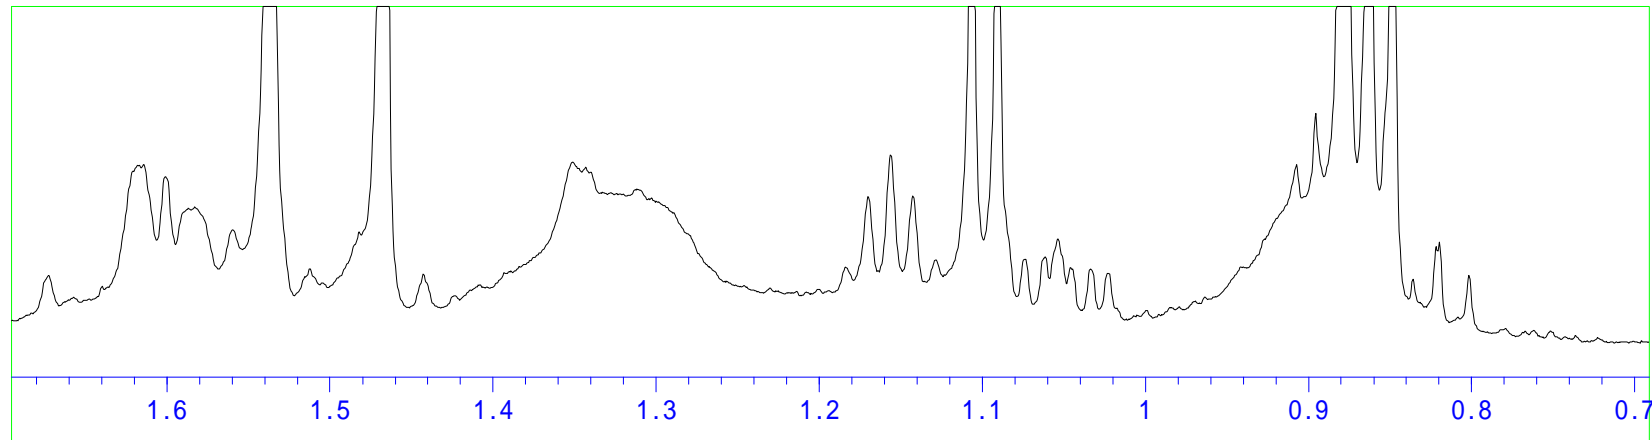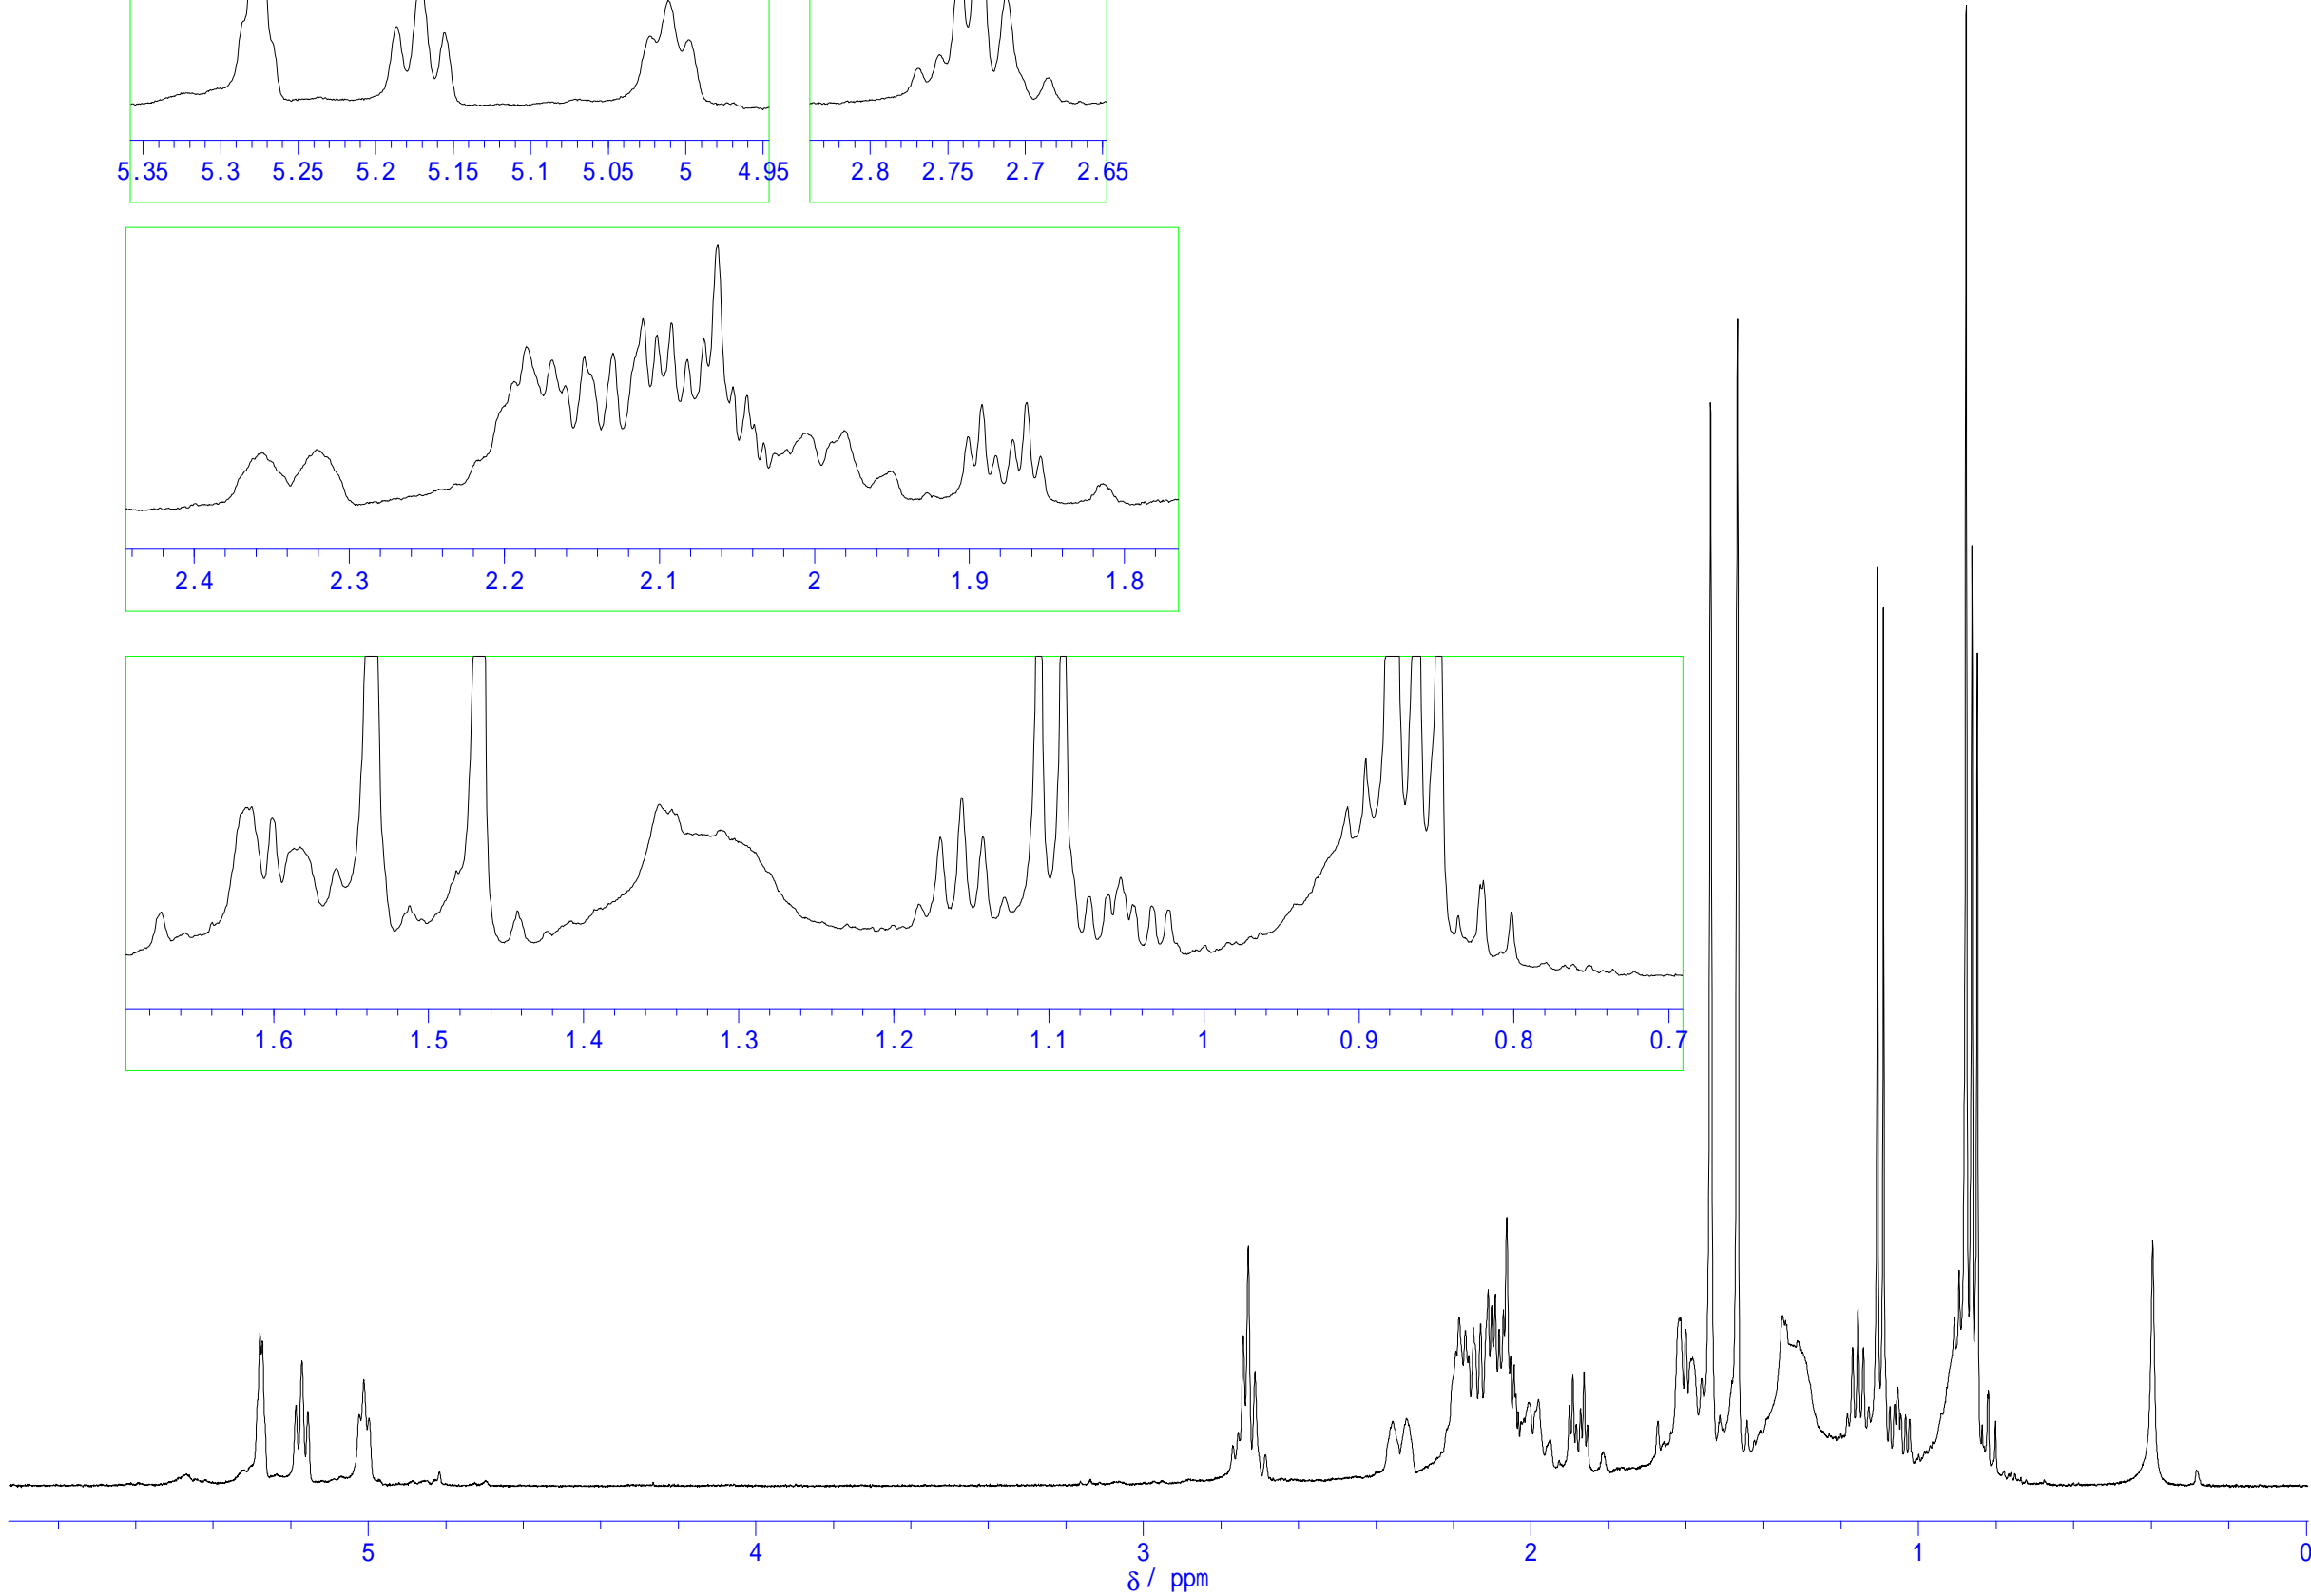

Oikawa PMT 1mg /90uL C6D6  
dH(Solv)=7.15ppm, dC(solv)=128.0ppm  
Bruker AMX-500/ GC-MS & NMR Lab.  
Grad. Sch. Agric., Hokkaido Univ.  
H=piccpmt/1 C=piccpmt/2

| No. | ppm    | Hz      | Height |
|-----|--------|---------|--------|
| 1   | 13.85  | 1741.5  | 0.63   |
| 2   | 15.42  | 1938.9  | 0.65   |
| 3   | 16.96  | 2133.2  | 0.56   |
| 4   | 17.51  | 2202.3  | 0.72   |
| 5   | 22.10  | 2779.1  | 0.73   |
| 6   | 24.87  | 3127.0  | 0.67   |
| 7   | 30.15  | 3791.3  | 0.20   |
| 8   | 31.46  | 3956.1  | 0.75   |
| 9   | 33.61  | 4226.7  | 0.76   |
| 10  | 34.15  | 4294.8  | 0.80   |
| 11  | 35.24  | 4432.2  | 0.68   |
| 12  | 37.69  | 4740.4  | 0.69   |
| 13  | 38.71  | 4868.6  | 0.37   |
| 14  | 40.08  | 5040.5  | 0.82   |
| 15  | 41.44  | 5211.4  | 0.83   |
| 16  | 121.56 | 15287.3 | 0.77   |
| 17  | 123.07 | 15477.5 | 0.74   |
| 18  | 127.46 | 16028.8 | 0.19   |
| 19  | 127.56 | 16042.1 | 0.69   |
| 20  | 127.81 | 16072.6 | 99.16  |
| 21  | 127.91 | 16085.8 | 3.98   |
| 22  | 128.00 | 16097.0 | 100    |
| 23  | 128.10 | 16109.2 | 3.58   |
| 24  | 128.19 | 16121.4 | 97.87  |
| 25  | 128.29 | 16133.6 | 4.38   |
| 26  | 128.95 | 16216.0 | 0.30   |
| 27  | 129.32 | 16262.8 | 0.18   |
| 28  | 129.39 | 16272.0 | 0.10   |
| 29  | 134.02 | 16853.8 | 0.25   |
| 30  | 136.08 | 17113.2 | 0.34   |
| 31  | 139.12 | 17495.7 | 0.25   |
| 32  | 149.52 | 18803.9 | 0.11   |

<sup>13</sup>C-NMR spectrum of phomactatriene (C6D6, 125 MHz)

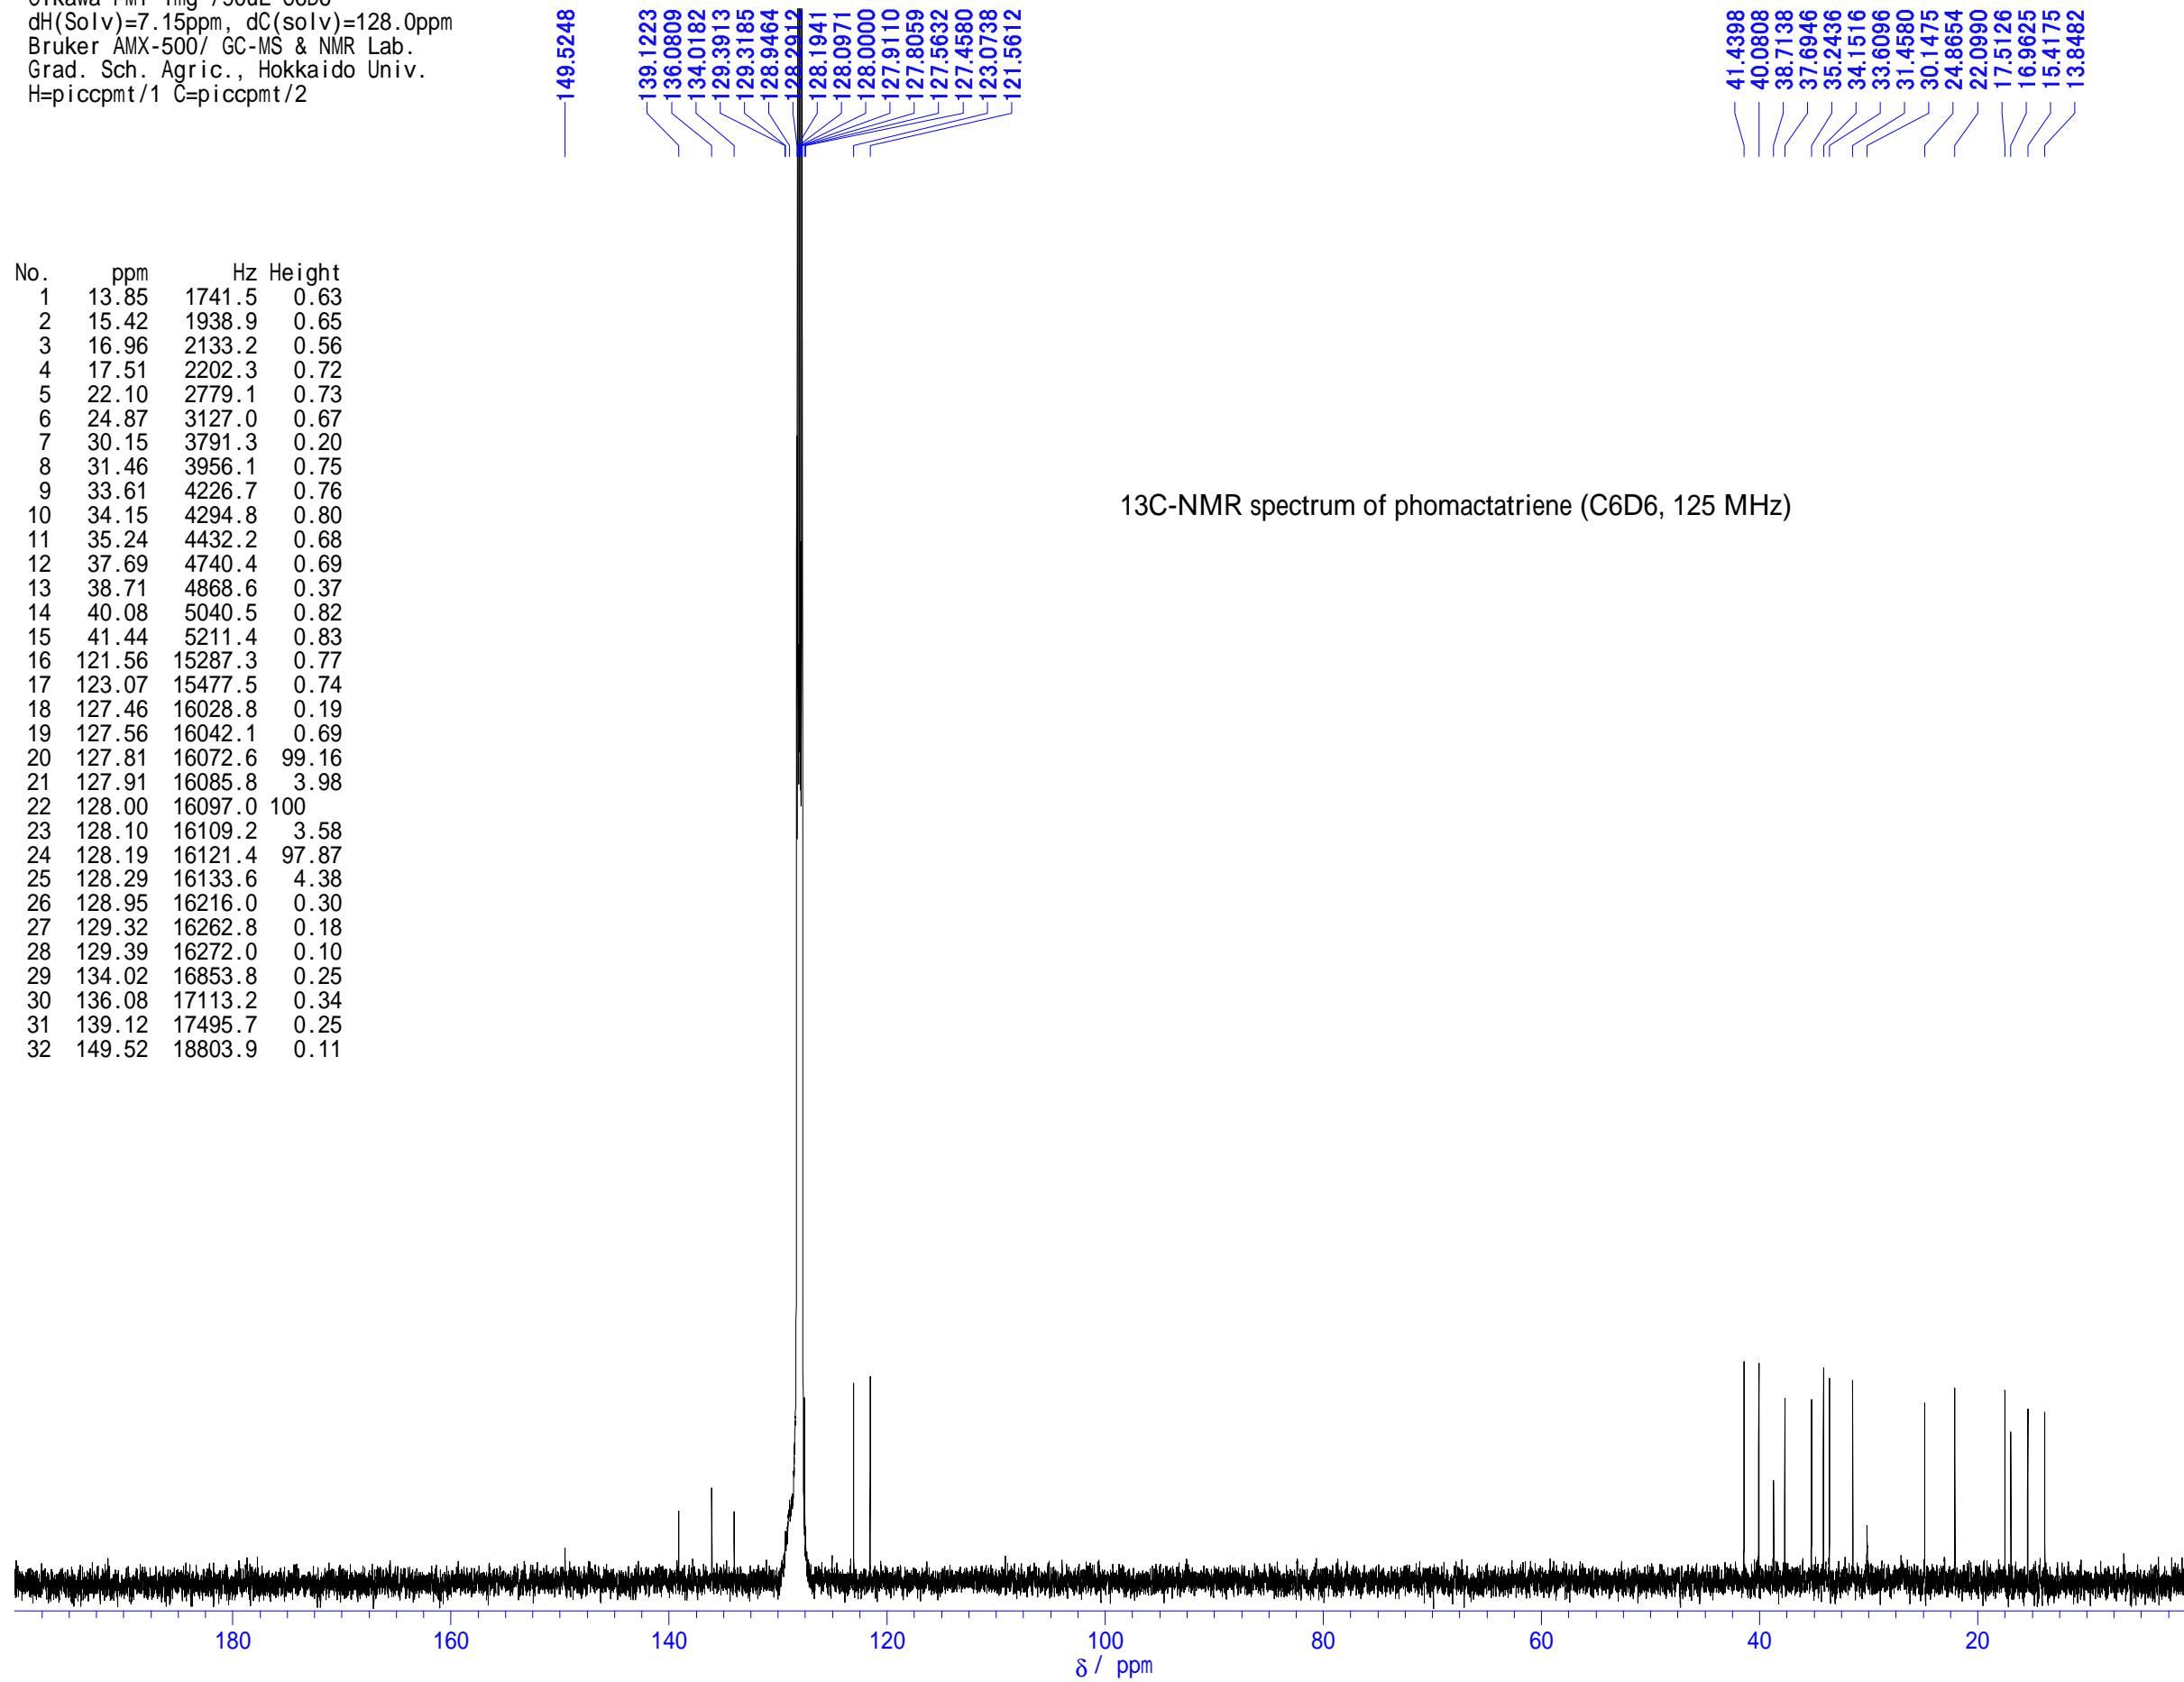

41.4398  
40.0808  
38.7138  
37.6946  
35.2436  
34.1516  
33.6096  
31.4580  
30.1475  
24.8654  
22.0990  
17.5126  
16.9625  
15.4175  
13.8482

File F:\XWIN\_NMR\PICCPMT\2\PDAT  
Date  
Comment  
Oikawa PMT 1mg /90uL C6D6  
dH(Solv)=7.15ppm, dC(solv)=1  
Bruker AMX-500/ GC-MS & NMR  
Grad. Sch. Agric., Hokkaido  
H=piccpmt/1 C=piccpmt/2

ObsNuc ?  
ExMode  
ObsFreq 125.76 MHz  
ObsSet 0.0 kHz  
ObsFine 10000.78 Hz  
Point 32768  
Frequency(Span) 33333.33 Hz  
Scan 0  
AcqTime 0.983 s  
PD 0.0 s  
Pulse1 10.0 μs  
IrrNuc  
ProbeHead  
Instrument  
Pulse Program  
Gradient Program  
Temperature 0.0  
Solvent  
Reference 241.812 ppm  
Broad.Factor 0.25 Hz  
Window Exponential  
RGain 0  
Operator \_\_\_\_\_

Exp 1.2

1H-1H COSY spectrum of phomactatriene (C6D6, 500 MHz)

5.5 5 4.5 4 3.5 3 2.5 2 1.5 1 ppm(1H)

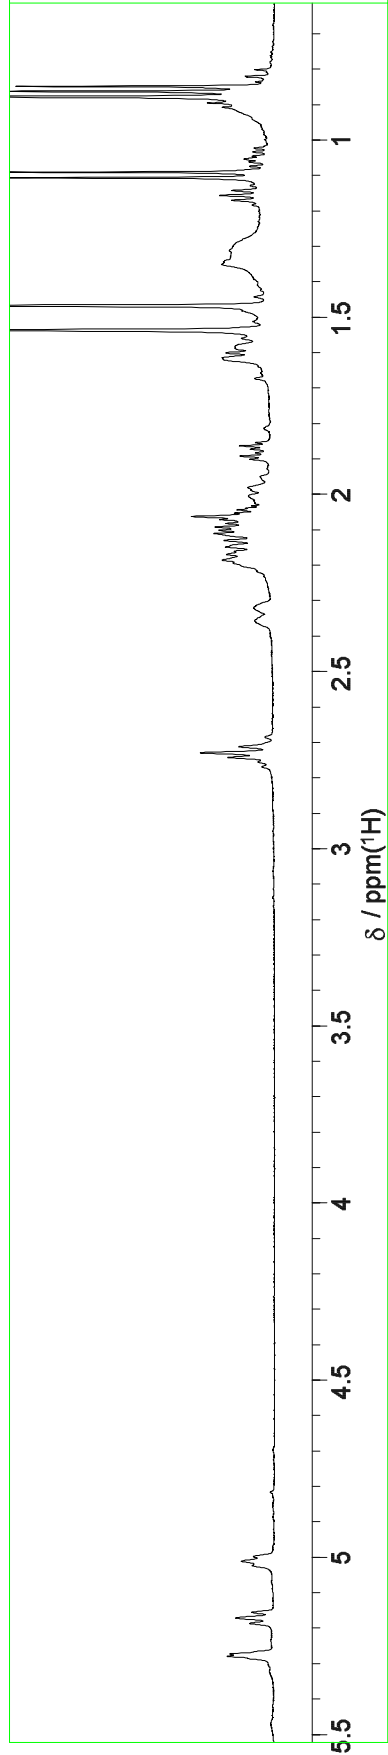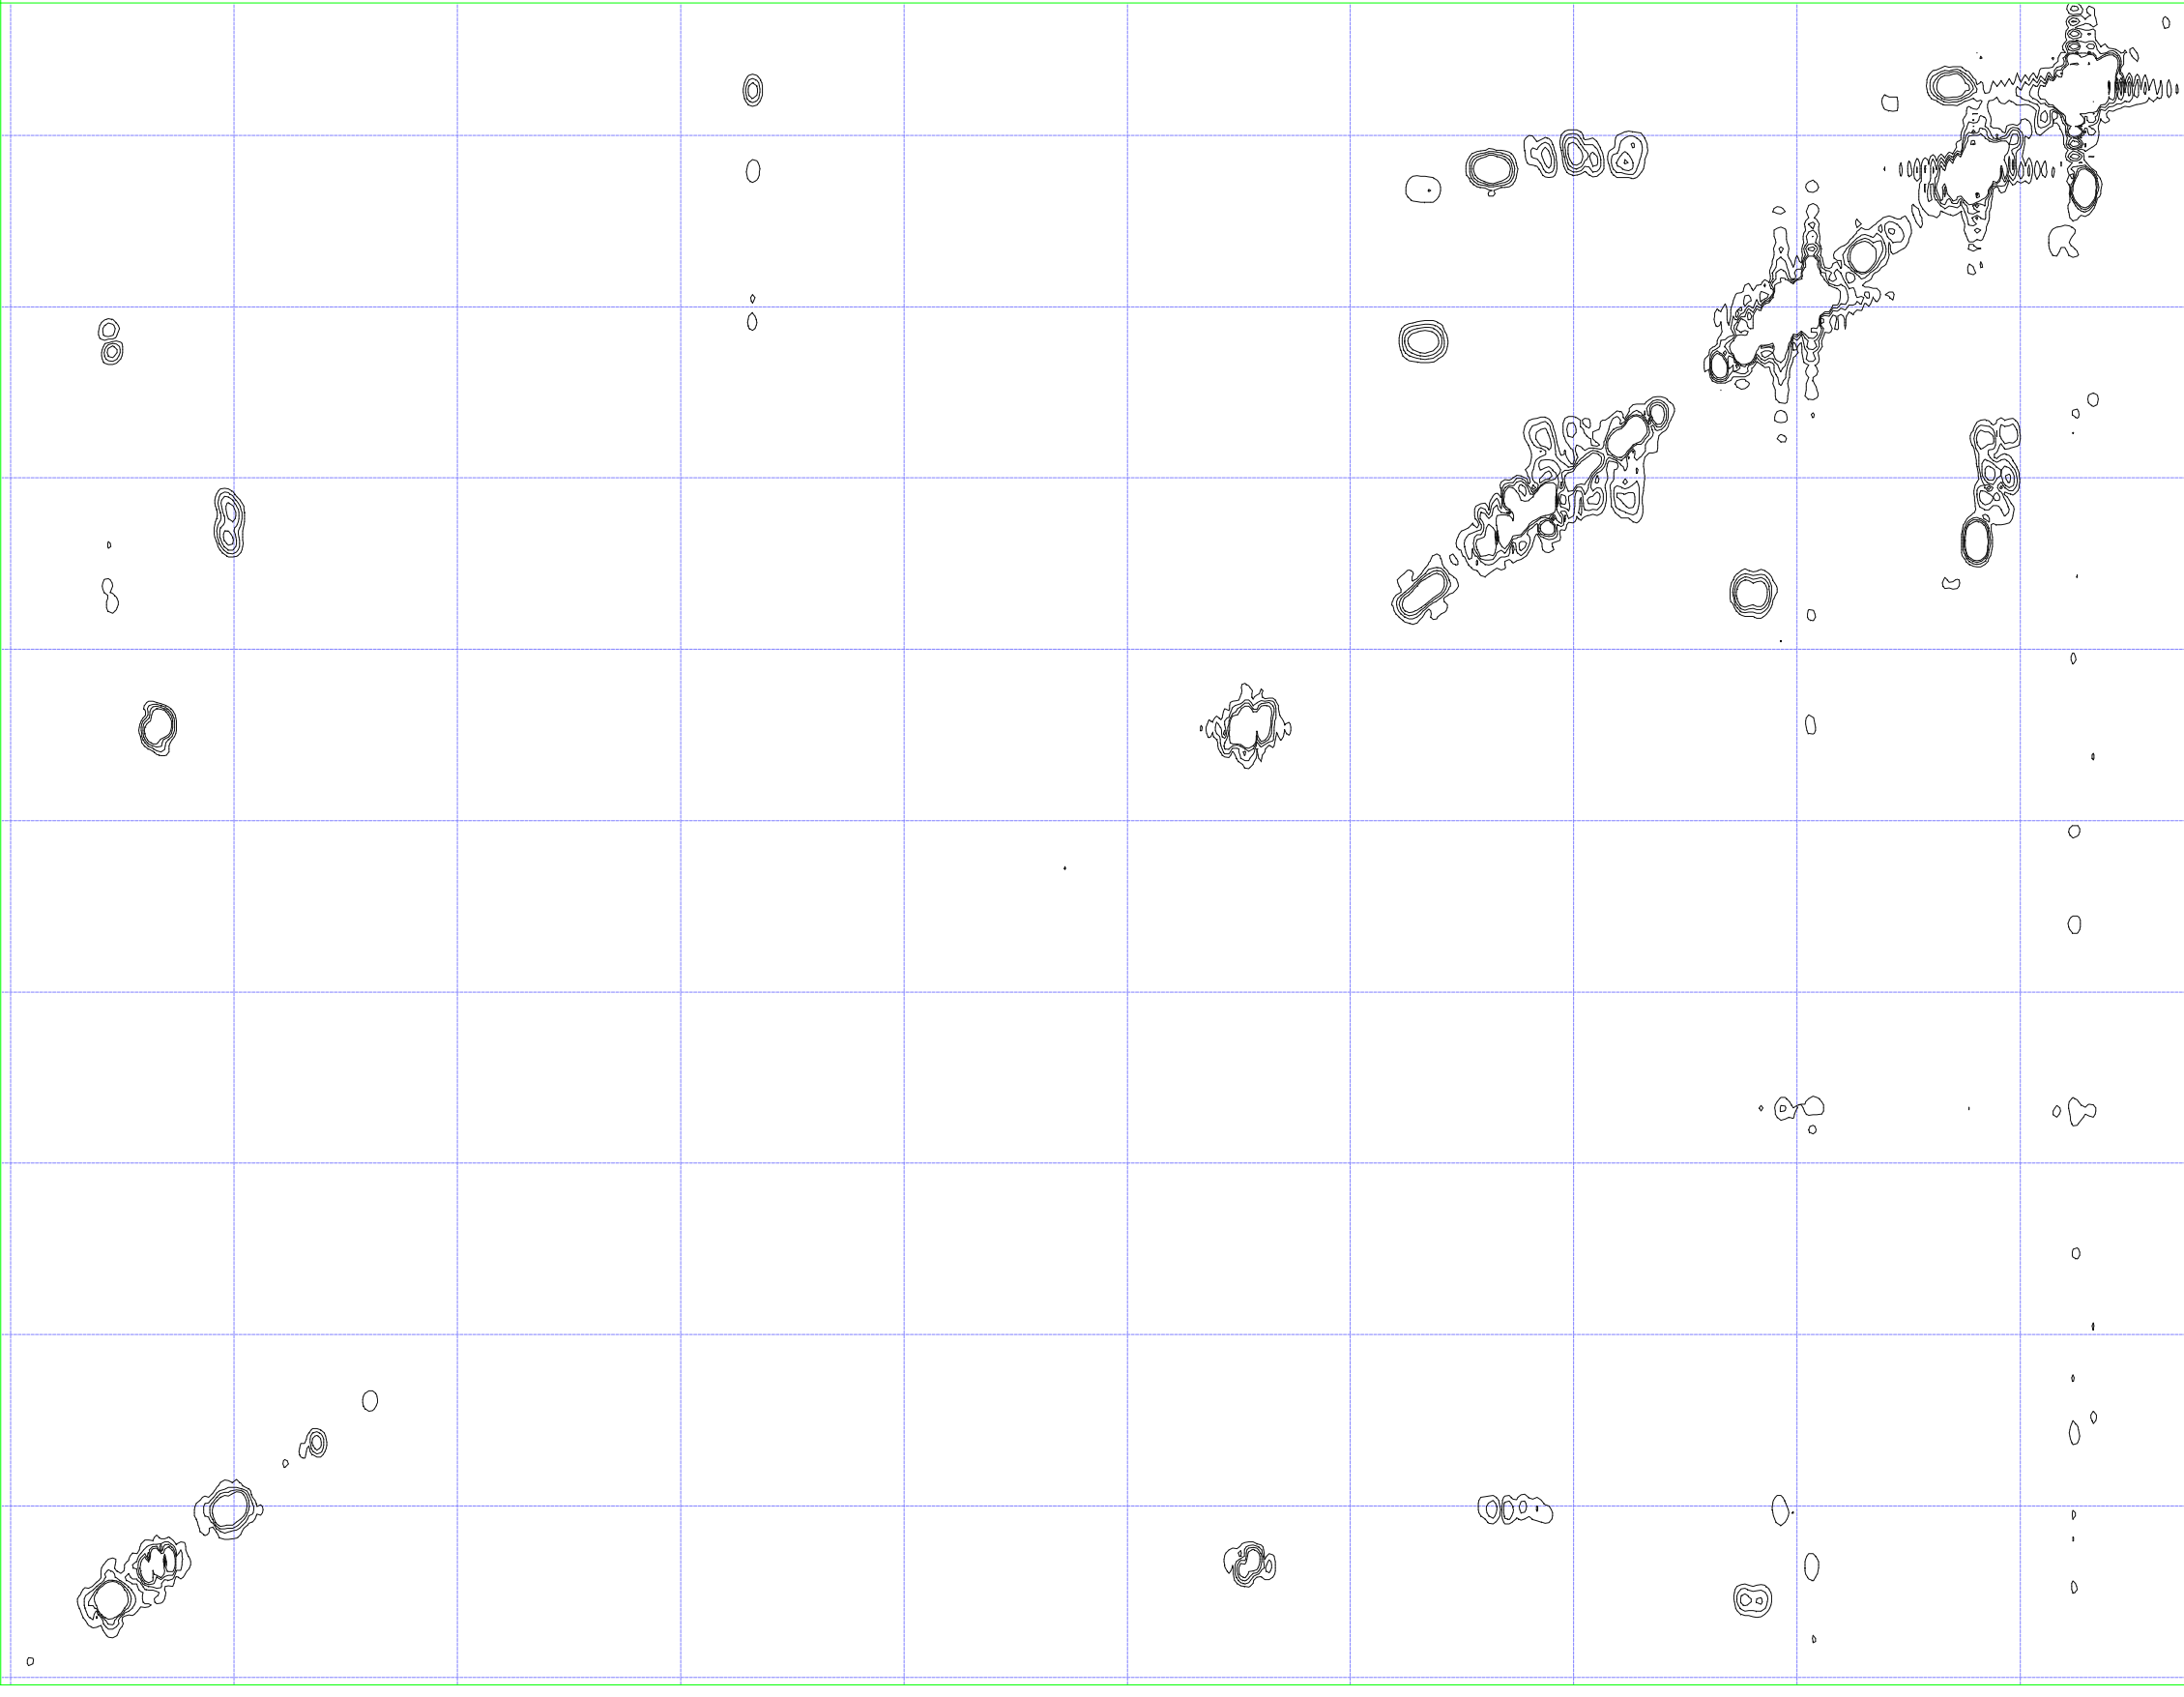

Comment  
File piccpmt/3  
COSY  
Oikawa PMT 1mg /90uL C6D6  
dH(Solv)=7.15ppm, dC(solv)=128.0p  
Bruker AMX-500/ GC-MS & NMR Lab.  
Grad. Sch. Agric., Hokkaido Univ.  
H=piccpmt/1 C=piccpmt/2

\$ F2-Acquisition Parameters  
Date Mon Jun 17 16:48:33 2002  
PULPROG cosygs  
TD 1024  
NS 1  
DS 2  
D[0] 0.000003 sec  
D[1] 1.999999 sec  
HL1 5 dB  
IN[0] 0.000218 sec  
P[1] 12.000000 usec  
SW 9.171891 ppm  
SWH 4587.155963 Hz  
FIDRES 0.223232 Hz  
AQ 0.111616 sec  
RG 4096  
NUCLEUS 1H  
SF01 500.131982 MHz  
BF1 500.130000 MHz  
O1 1982.147592 MHz  
SF02 0.000000 MHz  
BF2 500.130000 MHz  
O2 1982.147592 MHz  
LOKNUC 2H  
SOLVENT C6D6  
PROBHD 2.5 mm DUL 13C-1H-D Z-GR  
TE 300 K  
GRDPROG 2sine  
CNST[21] 10 %  
CNST[22] -10 %  
D[16] 0.000100 sec  
P[16] 1000.000000 usec  
L[21] 100

\$ F1-Acquisition Parameters  
TD 256  
ND0 1  
SW 9.171891 ppm  
SWH 4587.155963 Hz  
FIDRES 0.055808 Hz

\$ F2-Processing Parameters  
SI 1024  
SF 500.130062538213  
OFFSET 8.424184  
HZpPT 4.479648 Hz  
MC2 qf  
WDW SINE  
SSB 0.000000

\$ F1-Processing Parameters  
SI 512  
SF 500.130062538213  
OFFSET 8.424184  
REVERSE yes  
HZpPT 8.959297 Hz  
MC2 qf  
WDW SINE  
SSB 0.000000  
expt = ca. 9 min

NOESY spectrum of phomactatriene (C6D6, 500 MHz)

Exp 1.2

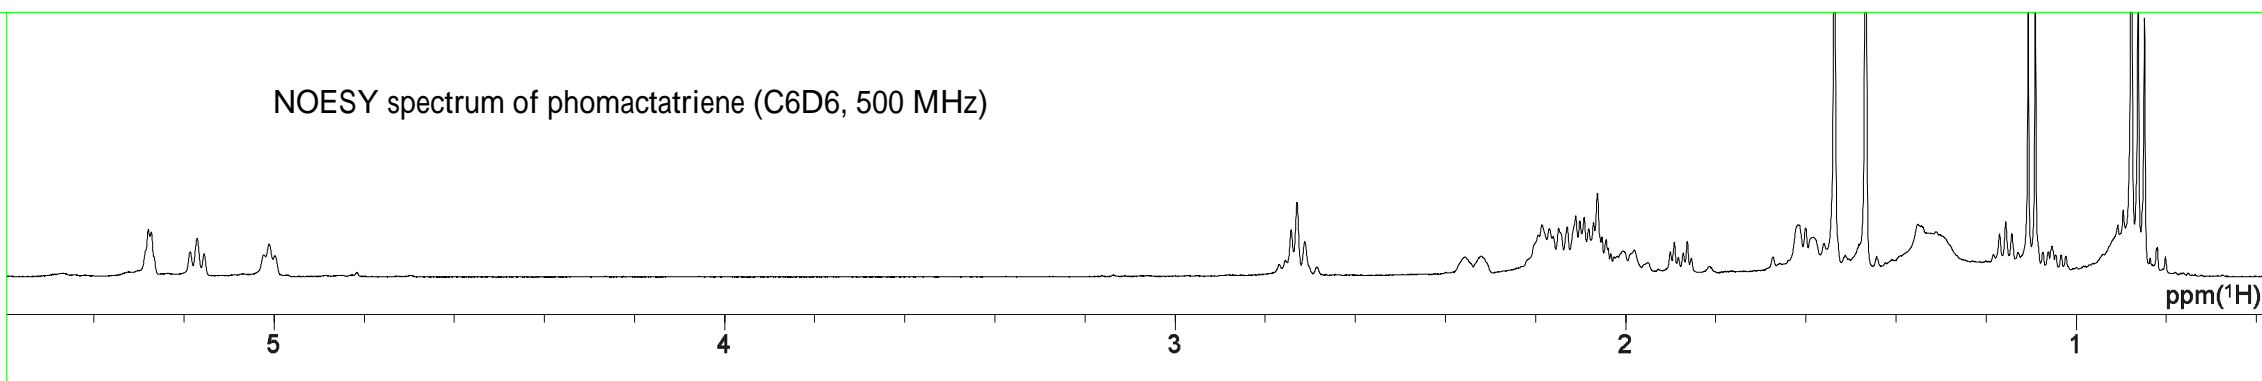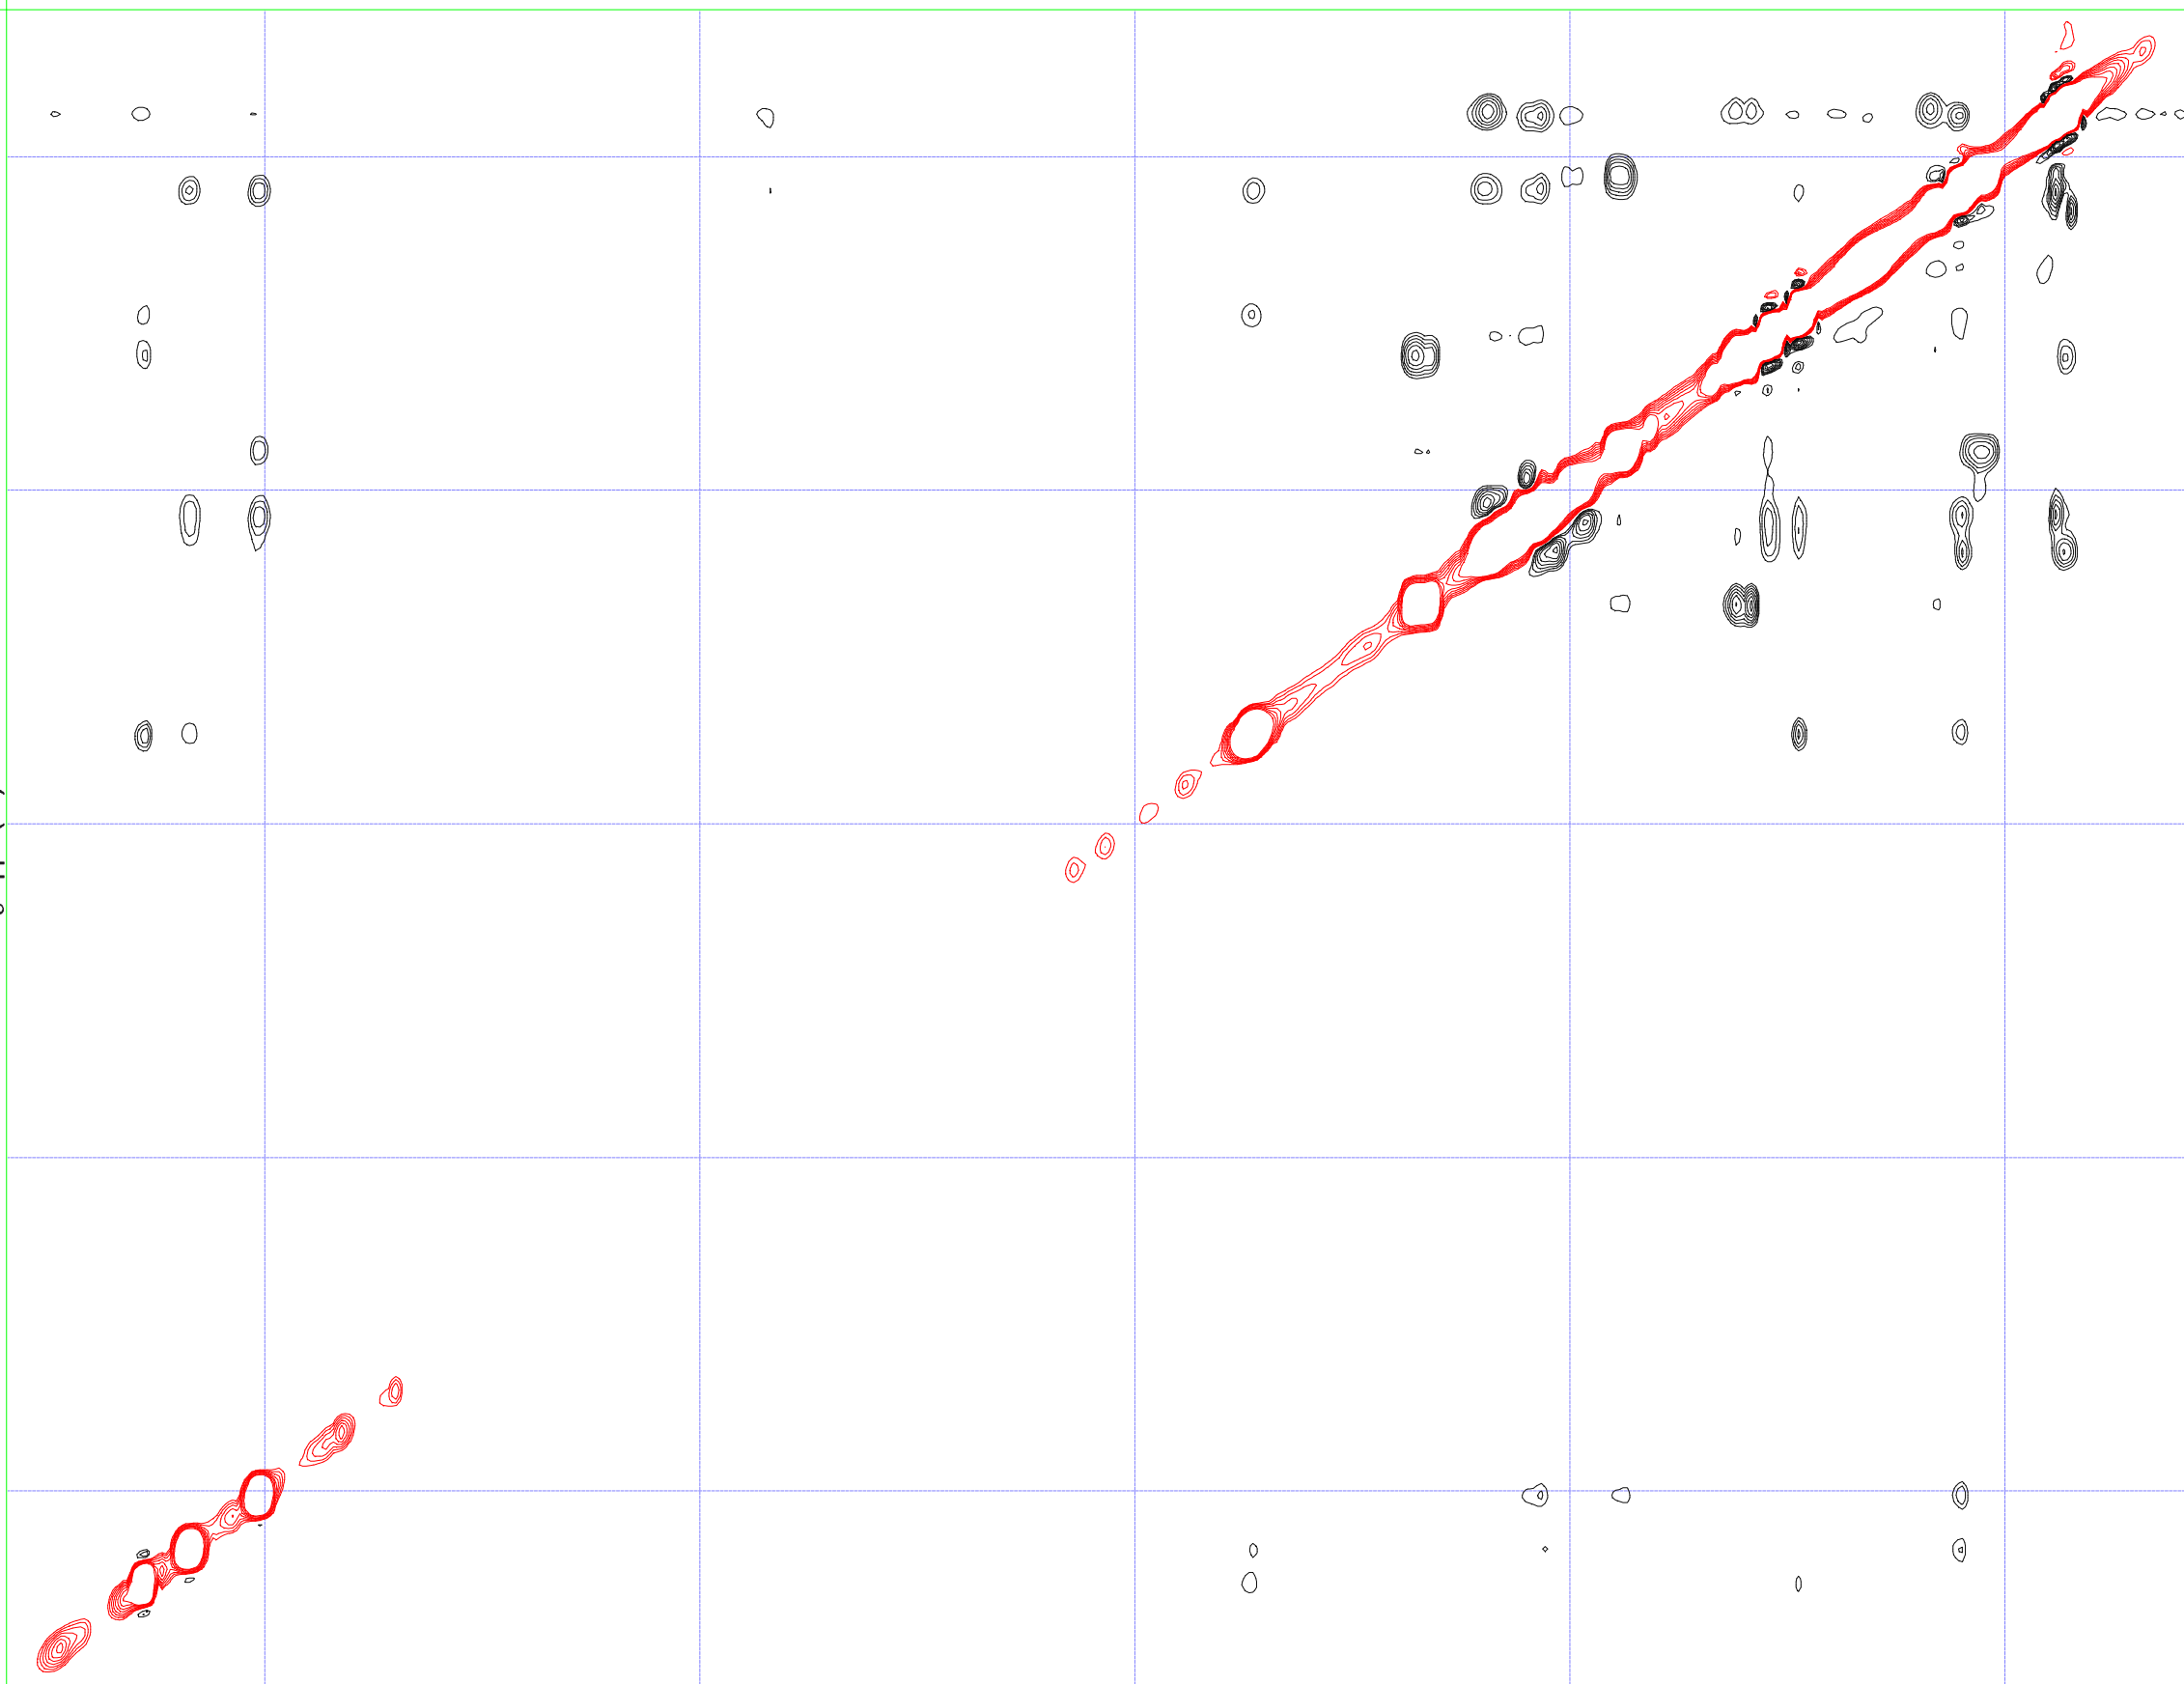

Comment  
 File piccpmt/4  
 noesy  
 Oikawa PMT 1mg /90uL C6D6  
 dH(Solv)=7.15ppm, dC(solv)=128.0p  
 Bruker AMX-500/ GC-MS & NMR Lab.  
 Grad. Sch. Agric., Hokkaido Univ.  
 H=piccpmt/1 C=piccpmt/2

\$ F2-Acquisition Parameters

Date Mon Jun 17 16:59:41 2002  
 PULPROG noesygs.jp  
 TD 1024  
 NS 16  
 DS 4  
 D[0] 0.000003 sec  
 D[1] 2.002048 sec  
 D[9] 1.000000 sec  
 HL1 5 dB  
 IN[0] 0.000109 sec  
 P[1] 12.000000 usec  
 V9 2.000000 %  
 SW 9.171891 ppm  
 SWH 4587.155963 Hz  
 FIDRES 0.223232 Hz  
 AQ 0.111616 sec  
 RG 2048  
 NUCLEUS 1H  
 SF01 500.131982 MHz  
 BF1 500.130000 MHz  
 O1 1982.147592 MHz  
 SF02 0.000000 MHz  
 BF2 500.130000 MHz  
 O2 1982.147592 MHz  
 LOKNUC 2H  
 SOLVENT C6D6  
 PROBHD 2.5 mm DUL 13C-1H-D Z-GR  
 TE 300 K  
 GRDPROG 1sine  
 CNST[21] 30 %  
 D[16] 0.000100 sec  
 P[16] 1000.000000 usec  
 L[21] 100

\$ F1-Acquisition Parameters

TD 256  
 ND0 2  
 SW 9.171891 ppm  
 SWH 4587.155963 Hz  
 FIDRES 0.055808 Hz

\$ F2-Processing Parameters

SI 512  
 SF 500.130062538213  
 OFFSET 8.424184  
 HZpPT 8.959297 Hz  
 MC2 qf  
 WDW QSINE  
 SSB 2.000000  
 PH\_mod pk  
 PHC0 35.422300 degree  
 PHC1 25.800010 degree

\$ F1-Processing Parameters

SI 512  
 SF 500.130062538213  
 OFFSET 8.424184  
 REVERSE no  
 HZpPT 8.959297 Hz  
 MC2 TPP1  
 WDW QSINE  
 SSB 2.000000  
 PH\_mod pk  
 PHC0 15.443750 degree  
 PHC1 -29.200000 degree  
 expt = ca. 4 hr

Exp 1.2

HMQC spectrum of phomactatriene (C6D6, 500 MHz)

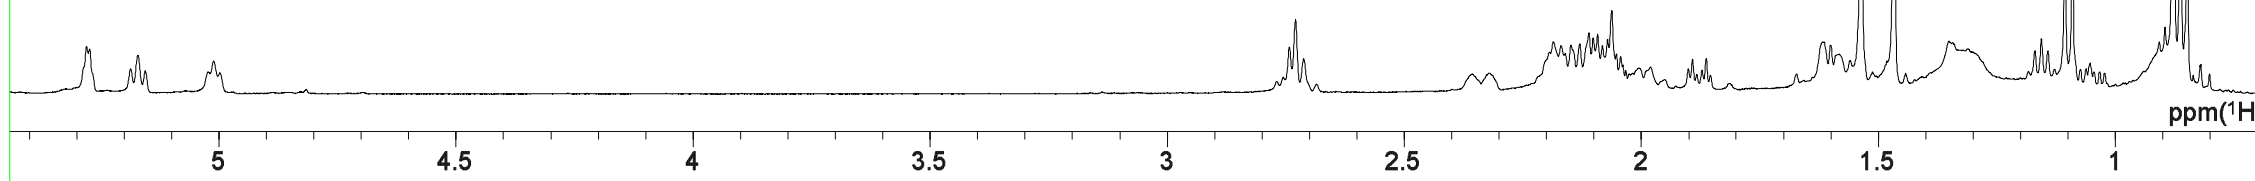

Comment  
File piccpmt/7  
hsqc  
Oikawa PMT 1mg /90uL C6D6  
dH(Solv)=7.15ppm, dC(solv)=128.0p  
Bruker AMX-500/ GC-MS & NMR Lab.  
Grad. Sch. Agric., Hokkaido Univ.  
H=piccpmt/1 C=piccpmt/2

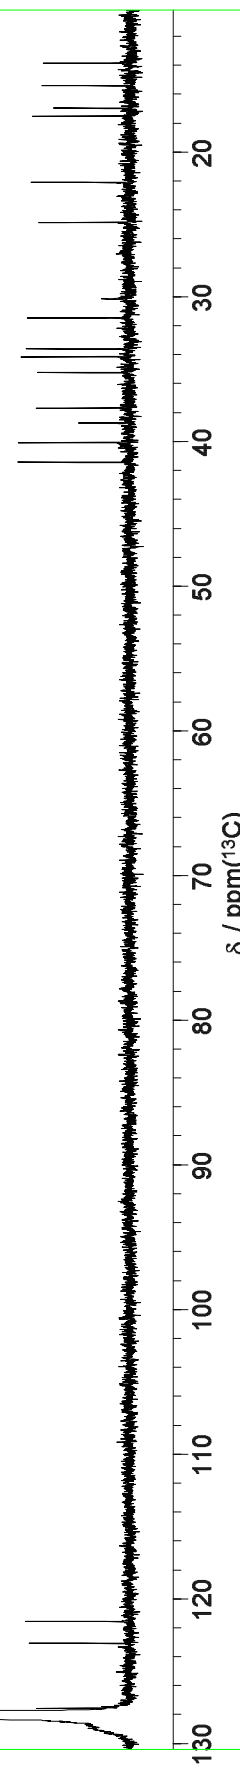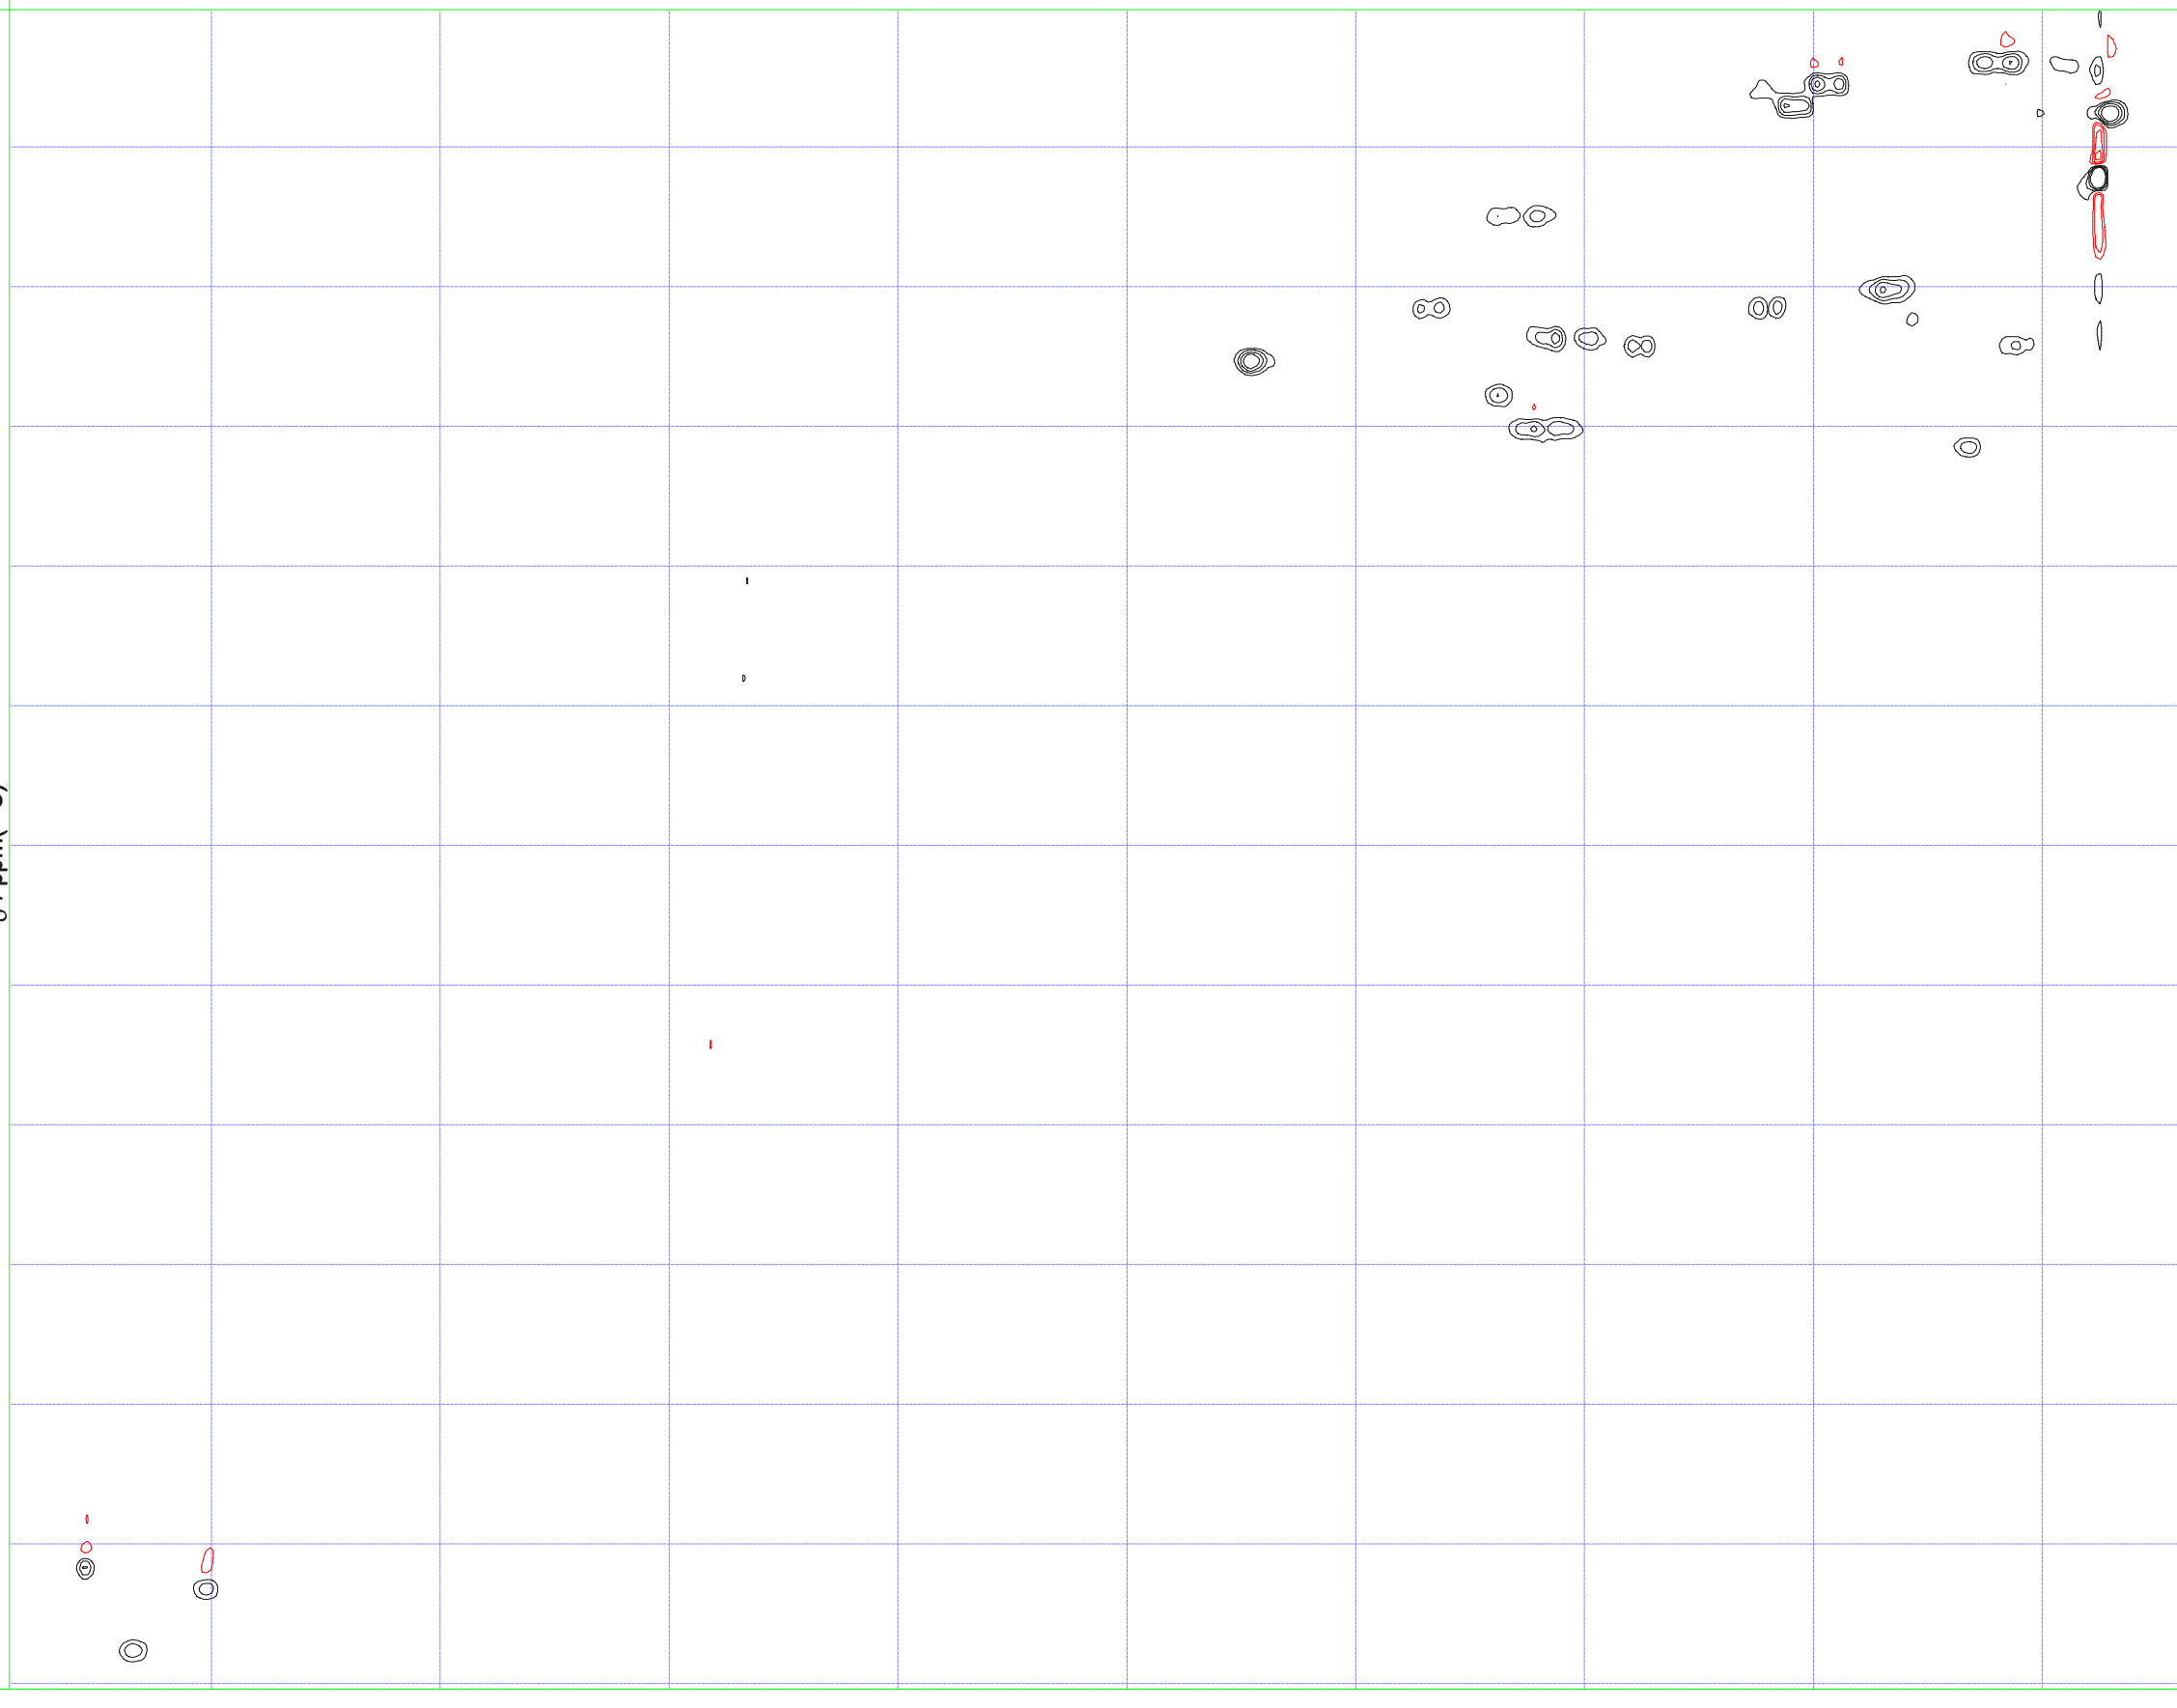

\$ F2-Acquisition Parameters  
Date Thu Jun 20 15:38:53 2002  
PULPROG invigstp.m  
TD 1024  
NS 96  
DS 2  
D[0] 0.00003 sec  
D[1] 2.181247 sec  
D[4] 0.001800 sec  
DL[0] 19 dB  
DL[5] 41 dB  
HL1 5 dB  
IN[0] 0.000013 sec  
P[1] 12.000000 usec  
P[3] 5.800000 usec  
P[31] 0.000000 usec  
SW 9.171891 ppm  
SWH 4587.155963 Hz  
FIDRES 0.223232 Hz  
AQ 0.111616 sec  
RG 32768  
NUCLEUS 1H  
SF01 500.131982 MHz  
BF1 500.130000 MHz  
O1 1982.147592 MHz  
SF02 125.768146 MHz  
BF2 125.757739 MHz  
O2 10407.375084 MHz  
LOKNUC 2H  
SOLVENT C6D6  
PROBHD 2.5 mm DUL 13C-1H-D Z-GR  
TE 300 K  
GRDPROG 3sine  
CNST[21] 40 %  
CNST[22] 15 %  
CNST[23] 10 %  
D[16] 0.000000 sec  
P[16] 1000.000000 usec  
L[21] 100  
\$ F1-Acquisition Parameters  
TD 256  
ND0 4  
SW 159.022778 ppm  
SWH 20000.000000 Hz  
FIDRES 0.012800 Hz  
\$ F2-Processing Parameters  
SI 1024  
SF 500.130062538213  
OFFSET 8.424184  
HZpPT 4.479648 Hz  
MC2 qf  
WDW QSINE  
SSB 2.000000  
PH\_mod pk  
PHC0 -100.325000 degree  
PHC1 -25.600000 degree  
\$ F1-Processing Parameters  
SI 512  
SF 125.757762832763  
OFFSET 162.0858  
REVERSE no  
HZpPT 39.062500 Hz  
MC2 TPPI  
WDW QSINE  
SSB 2.000000  
PH\_mod pk  
PHC0 289.530900 degree  
PHC1 -253.800000 degree  
expt = ca. 16 hr

Exp 1.2

HMBC spectrum of phomactatriene (C6D6, 500 MHz)

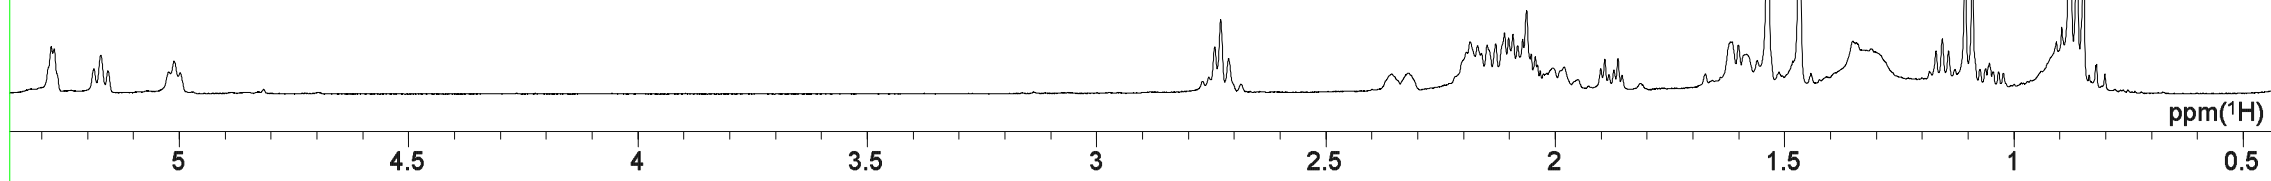

Comment File piccpmt/6  
HMBC  
Oikawa PMT 1mg /90uL C6D6  
dH(Solv)=7.15ppm, dC(solv)=128.0p  
Bruker AMX-500/ GC-MS & NMR Lab.  
Grad. Sch. Agric., Hokkaido Univ.  
H=piccpmt/1 C=piccpmt/2

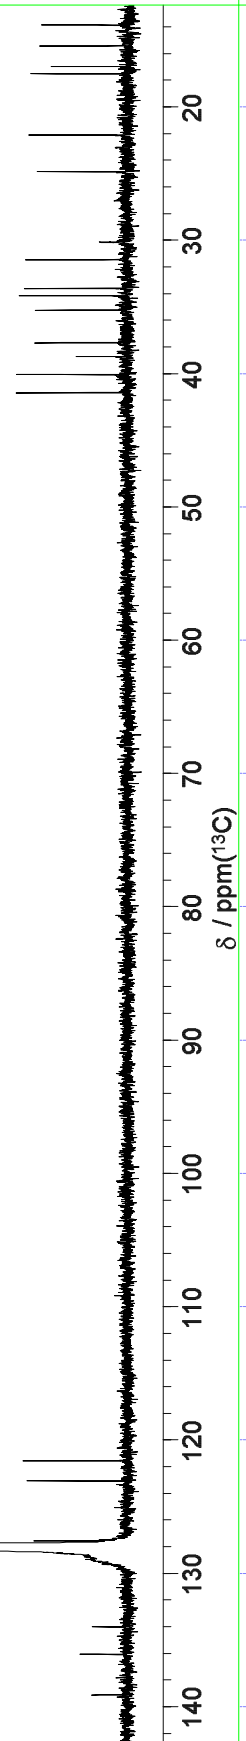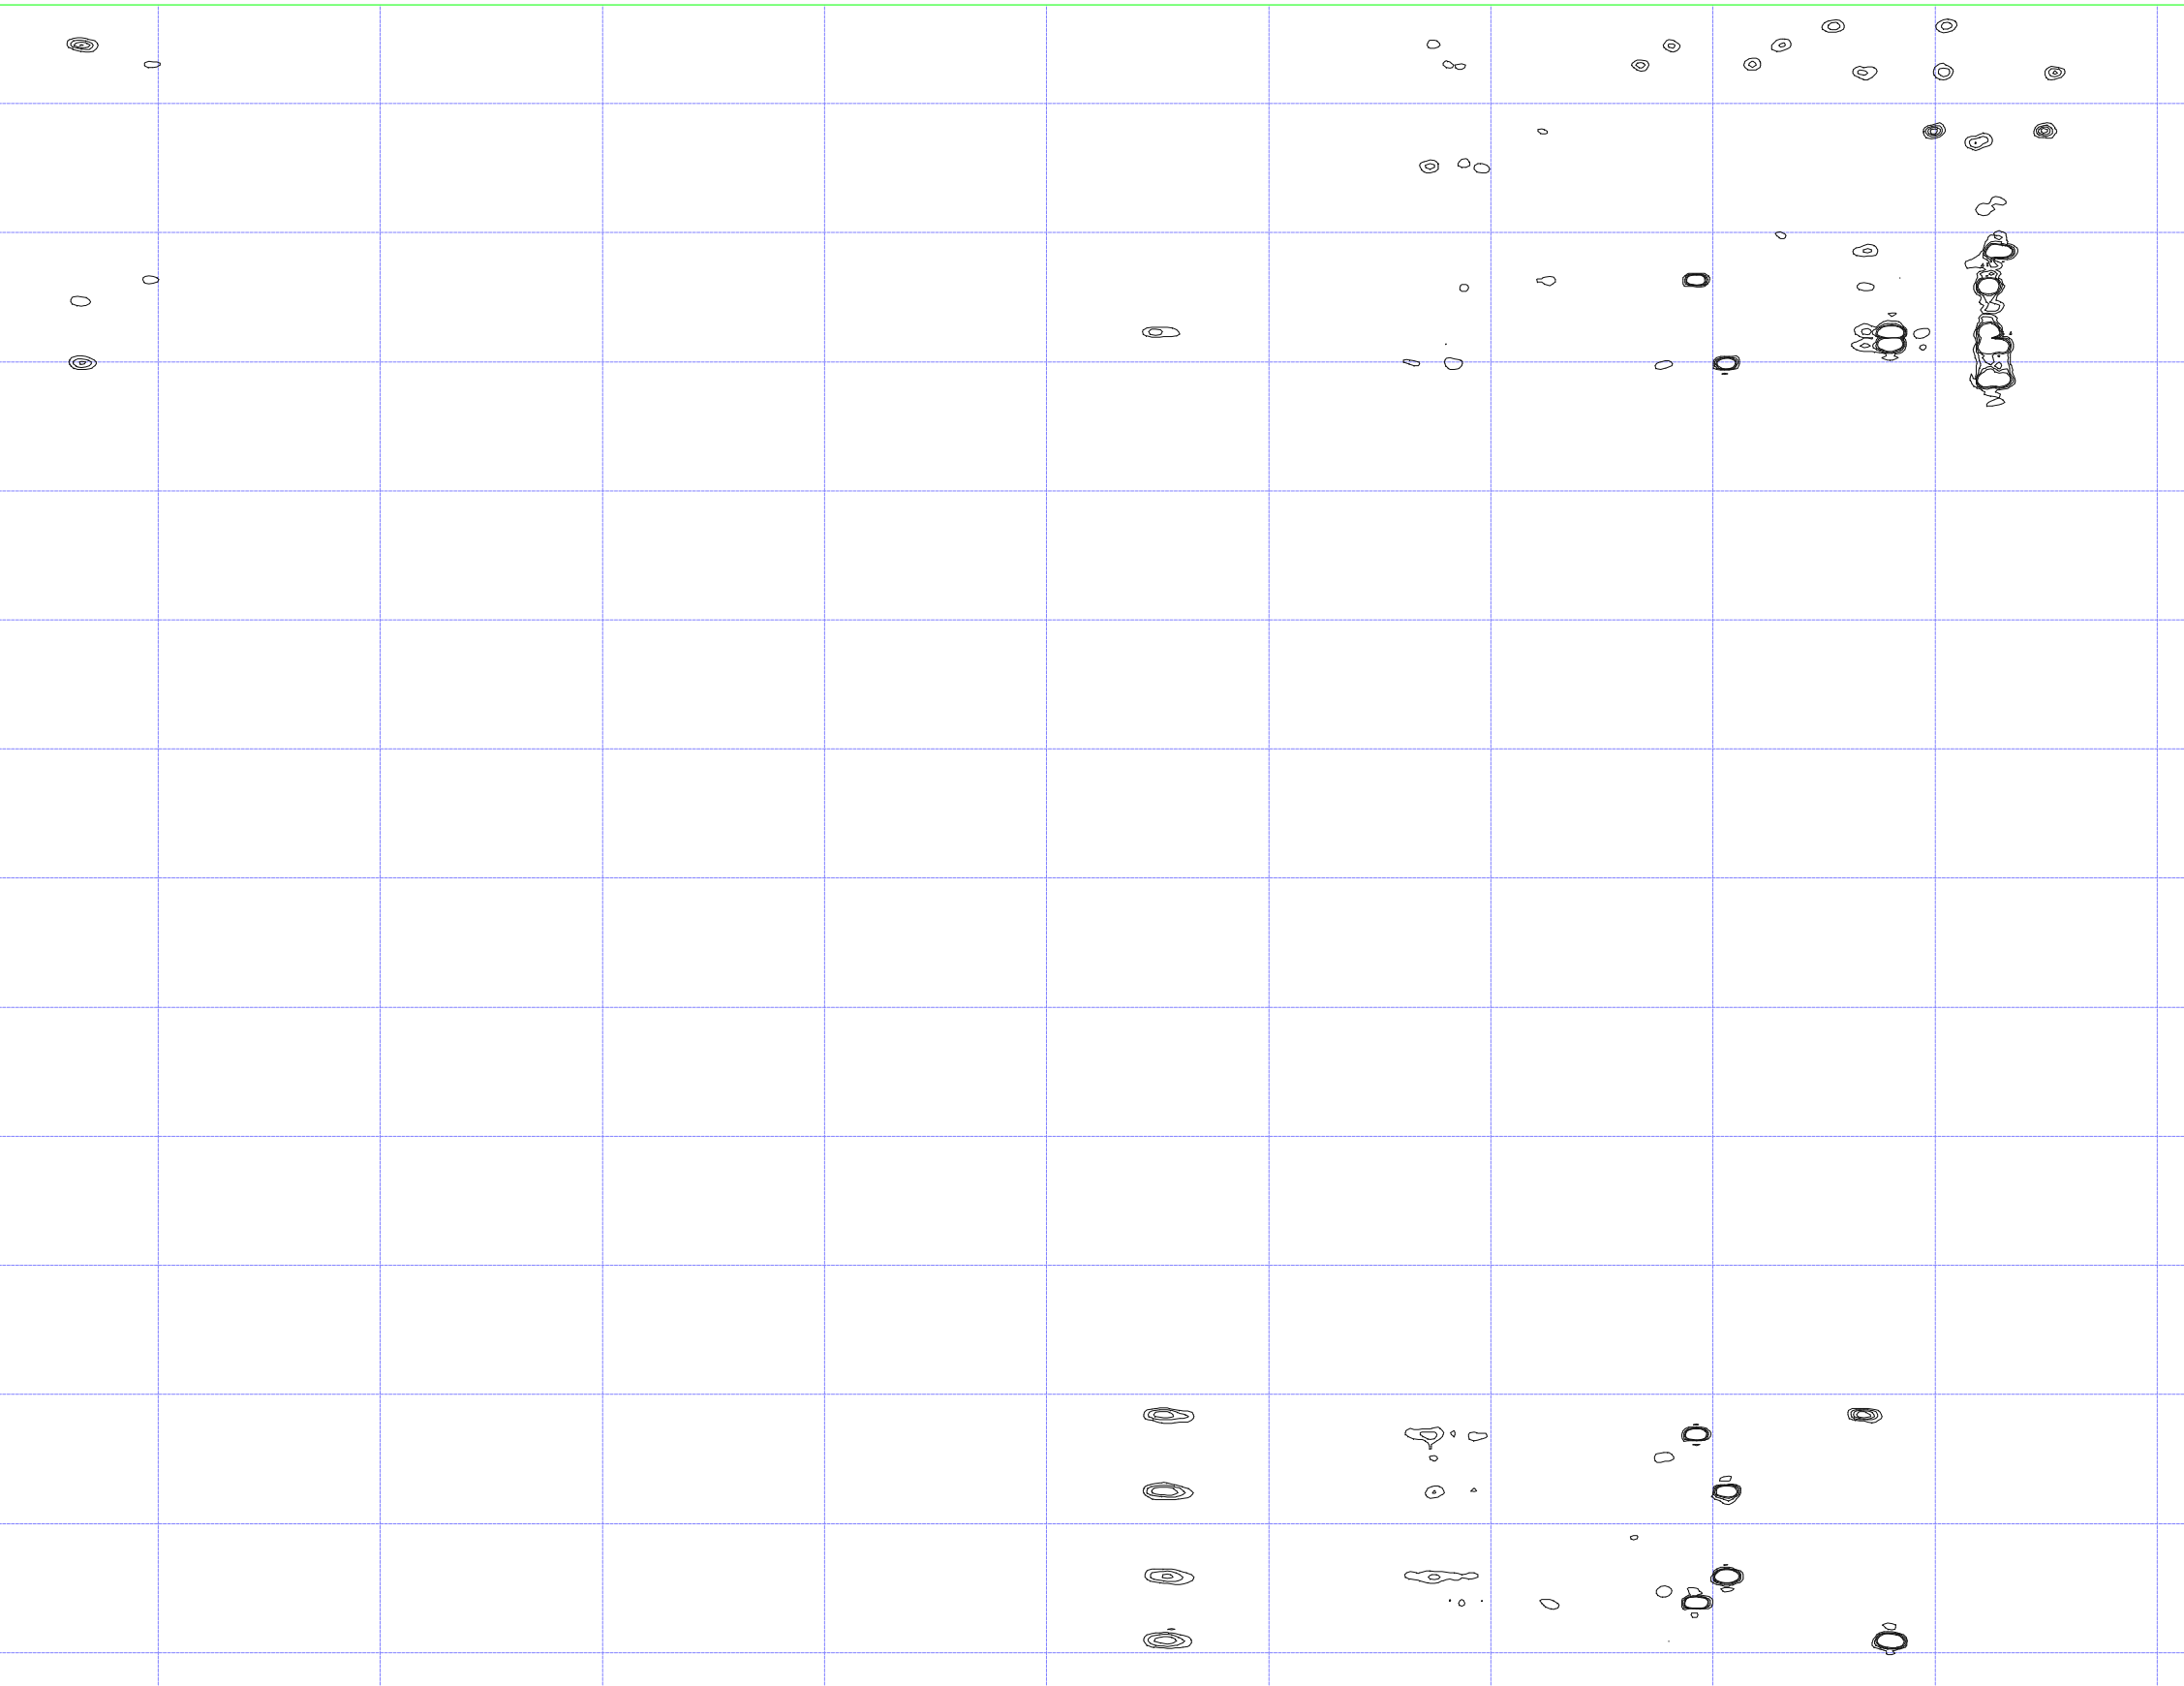

\$ F2-Acquisition Parameters  
Date Tue Jun 18 02:02:20 2002  
PULPROG inv4gs1prnd.jp  
TD 1024  
NS 192  
DS 2  
D[0] 0.000003 sec  
D[1] 2.000000 sec  
D[2] 0.003450 sec  
D[6] 0.070000 sec  
DL[0] 19 dB  
HL1 5 dB  
IN[0] 0.000025 sec  
P[1] 12.000000 usec  
P[3] 5.800000 usec  
SW 9.171891 ppm  
SWH 4587.155963 Hz  
FIDRES 0.223232 Hz  
AQ 0.111616 sec  
RG 32768  
NUCLEUS 1H  
SF01 500.131982 MHz  
BF1 500.130000 MHz  
O1 1982.147592 MHz  
SF02 125.768146 MHz  
BF2 125.757739 MHz  
O2 10407.375084 MHz  
LOKNUC 2H  
SOLVENT C6D6  
PROBHD 2.5 mm DUL 13C-1H-D Z-GR  
TE 300 K  
GRDPROG 3sine  
CNST[21] 10 %  
CNST[22] 10 %  
CNST[23] 5 %  
D[16] 0.000000 sec  
P[16] 1000.000000 usec  
L[21] 100  
\$ F1-Acquisition Parameters  
TD 256  
NDO 2  
SW 159.022778 ppm  
SWH 20000.000000 Hz  
FIDRES 0.012800 Hz  
\$ F2-Processing Parameters  
SI 1024  
SF 500.130062538213  
OFFSET 8.424184  
HZpPT 4.479648 Hz  
MC2 qf  
WDW GM  
GB 0.300000  
LB -10.000000  
\$ F1-Processing Parameters  
SI 512  
SF 125.757762832763  
OFFSET 162.0858  
REVERSE no  
HZpPT 39.062500 Hz  
MC2 qf  
WDW QSINE  
SSB 6.000000  
expt = ca. 29 hr

<sup>13</sup>C-NMR spectrum of phomactatriene incorporated with [1-<sup>13</sup>C]-acetate (C<sub>6</sub>D<sub>6</sub>, 125 MHz)

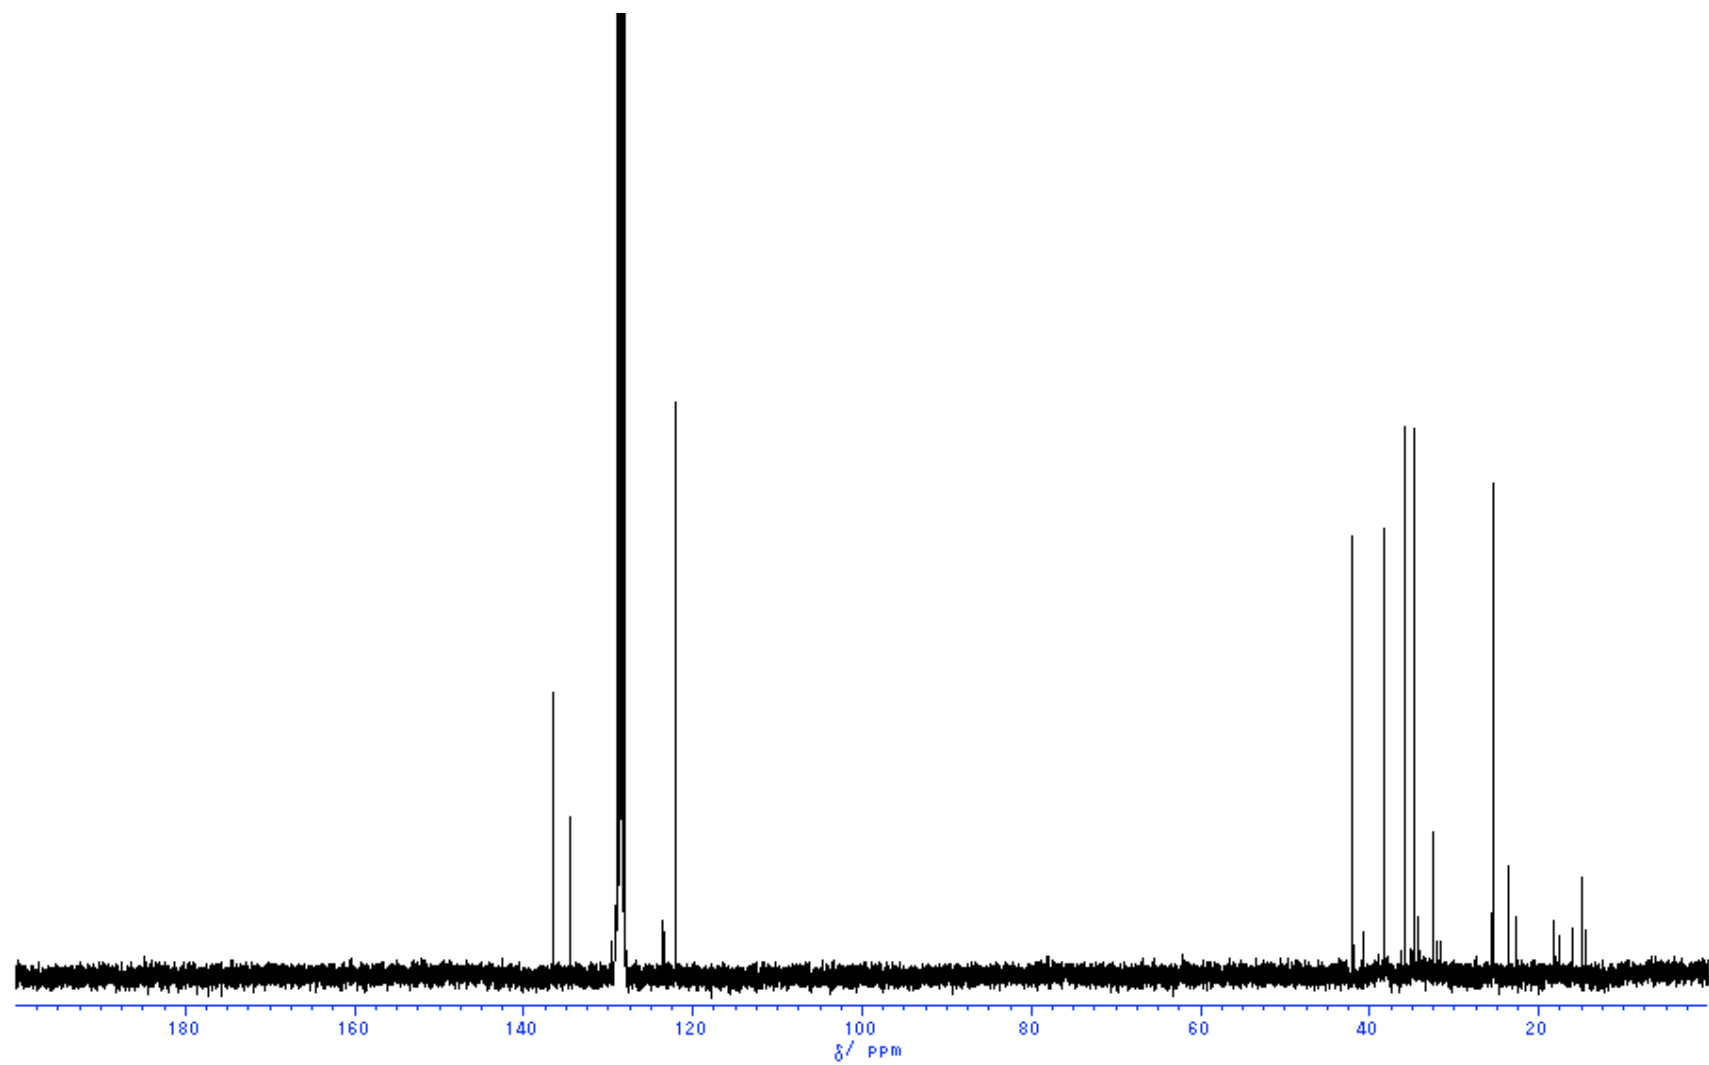



<sup>13</sup>C-NMR spectrum of phomactatriene incorporated with [1,2-<sup>13</sup>C<sub>2</sub>]-acetate (C<sub>6</sub>D<sub>6</sub>, 125 MHz)

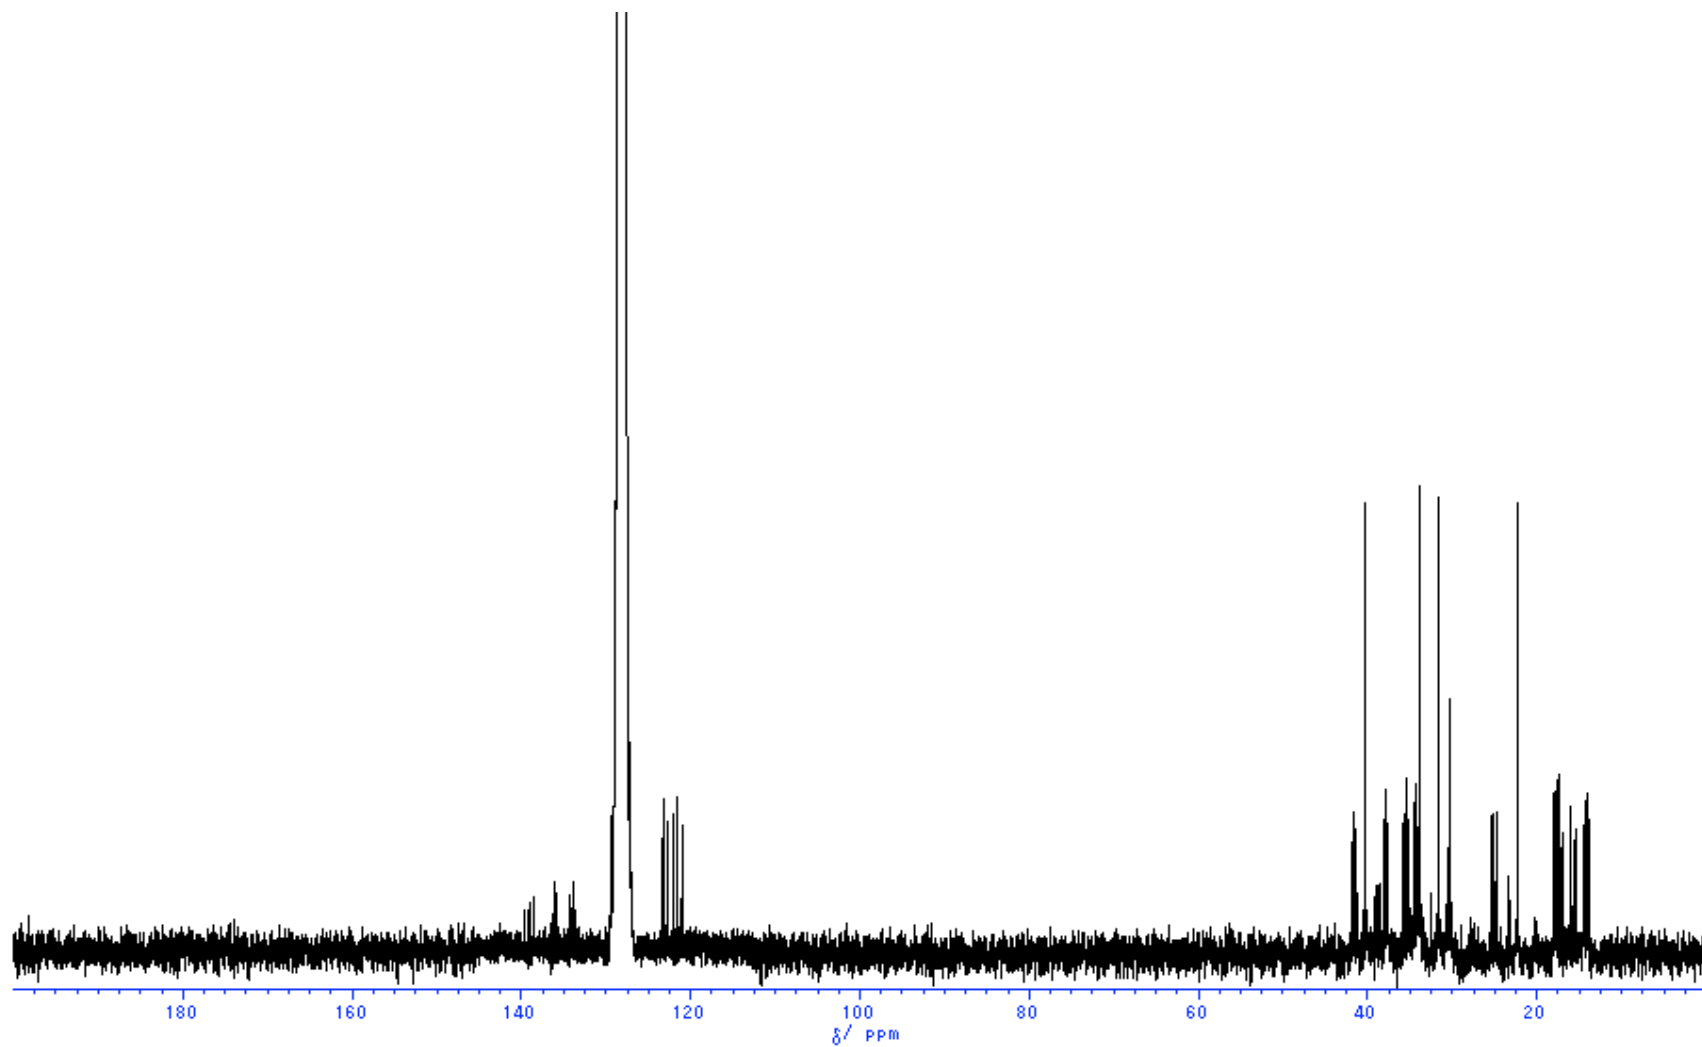

$^{13}\text{C}$ -NMR spectrum of phomactatriene incorporated with  
[1,2- $^{13}\text{C}_2$ ]-acetate ( $\text{C}_6\text{D}_6$ , 125 MHz)

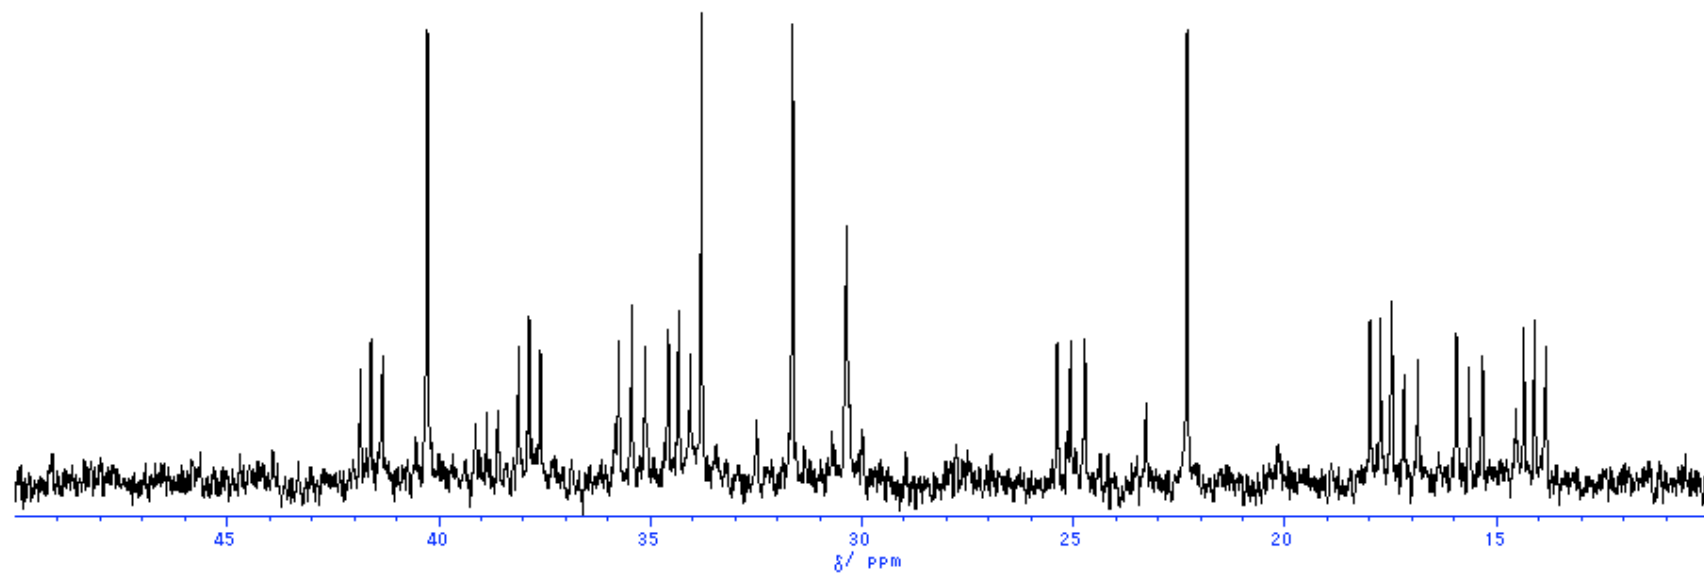

$^{13}\text{C}$ -NMR spectrum of phomactatriene incorporated with  
[1,2- $^{13}\text{C}_2$ ]-acetate ( $\text{C}_6\text{D}_6$ , 125 MHz)

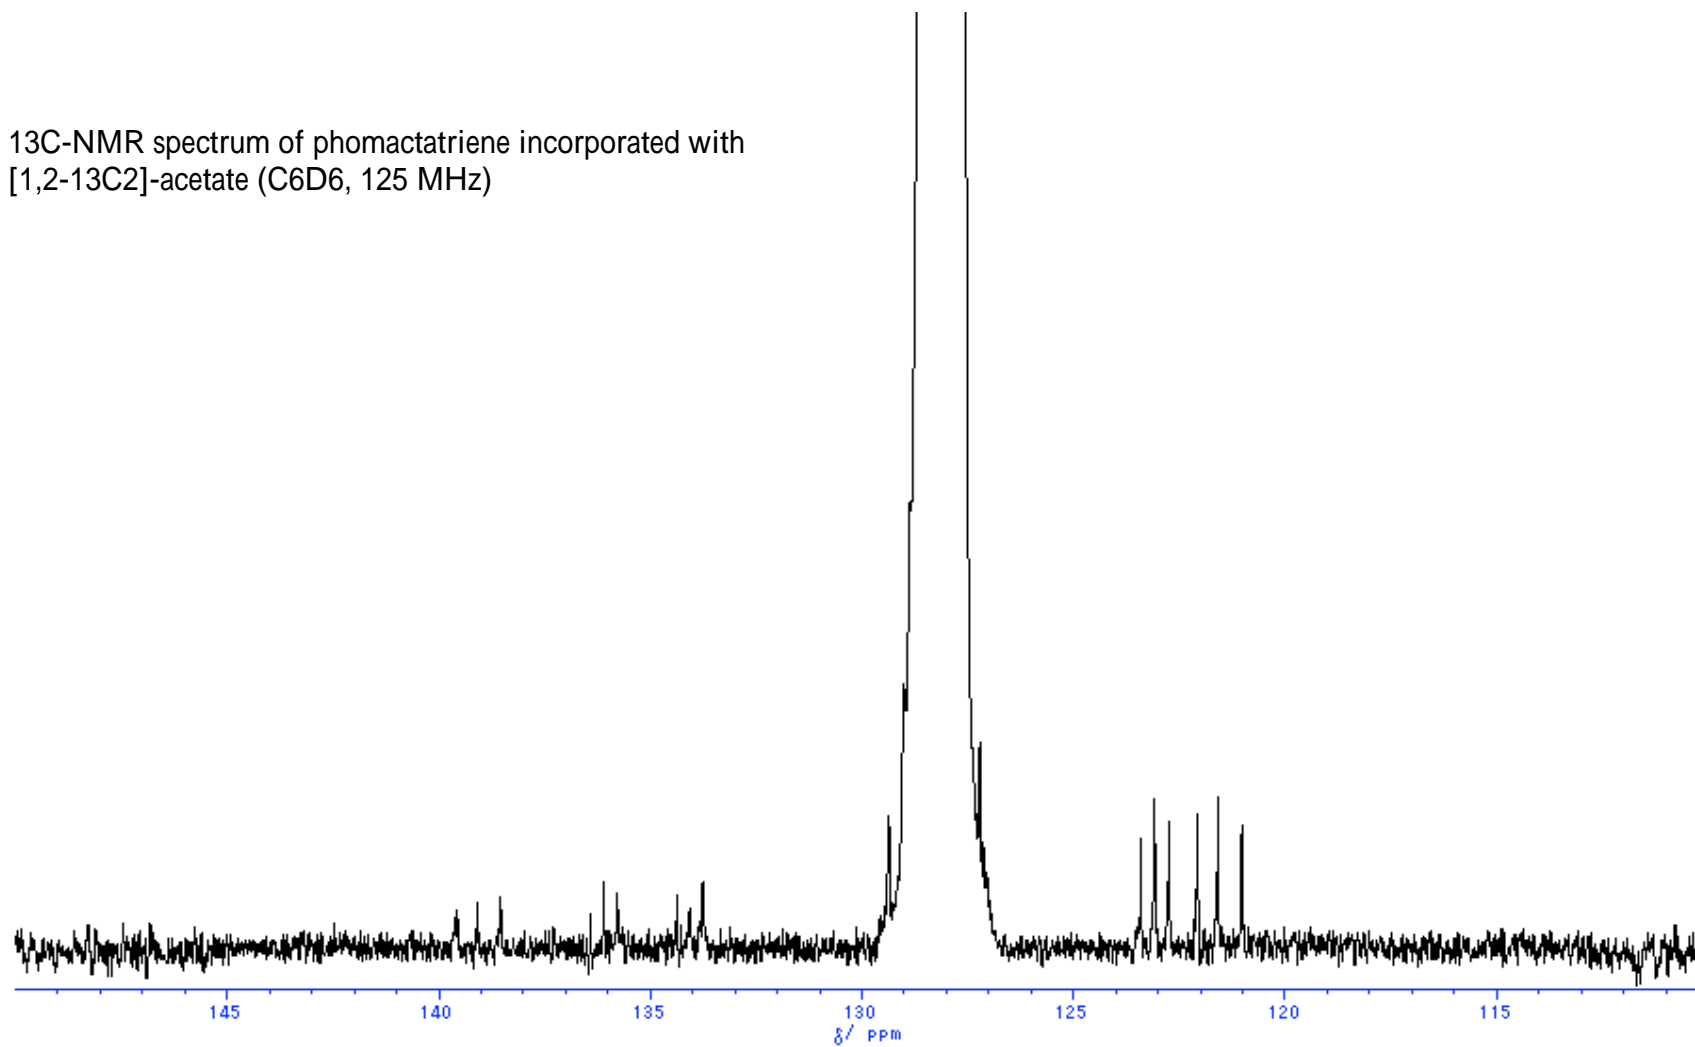

Supplement: b401377h.pdf [file b401377h.pdf]
